# Supplementary material for: The structure and electric dipole moment of camphor determined by rotational spectroscopyElectronic supplementary information (ESI) available: Measured and fitted frequencies of field-free rotational transitions and of Stark components, and the results of fitting the molecular geometry. See http://www.rsc.org/suppdata/cp/b2/b212029a/
Source: Royal Society of Chemistry journal article supplement (doi:10.1039/b212029a), 2003-01-29
Supplement: tables.pdf [file tables.pdf]

Table S1. The observed and the obs.-calc. frequencies (MHz) of measured rotational transitions in the ground state of the parent isotopomer of camphor.

---

Camphor ground state, combined supersonic FTMW and room-temperature MMW

---

Obs-calc differences are from fit of Watson's reduced Hamiltonian in  
 ---> reduction-A, representation-I.r <---

| TRANSITION                          | Observed  | Obs-Calc | Error |
|-------------------------------------|-----------|----------|-------|
| ! Supersonic expansion FTMW spectra |           |          |       |
| ! a-type transitions                |           |          |       |
| 3, 1, 3 <- 2, 1, 2                  | 6701.753  | 0.000    | 0.002 |
| 3, 0, 3 <- 2, 0, 2                  | 6774.254  | 0.000    | 0.002 |
| 3, 1, 2 <- 2, 1, 1                  | 6958.158  | 0.000    | 0.002 |
| 4, 1, 4 <- 3, 1, 3                  | 8919.513  | 0.000    | 0.002 |
| 4, 0, 4 <- 3, 0, 3                  | 8975.682  | -0.002   | 0.002 |
| 4, 2, 3 <- 3, 2, 2                  | 9107.764  | 0.001    | 0.002 |
| 4, 3, 2 <- 3, 3, 1                  | 9151.676  | 0.000    | 0.002 |
| 4, 1, 3 <- 3, 1, 2                  | 9250.655  | -0.001   | 0.002 |
| 4, 2, 2 <- 3, 2, 1                  | 9253.678  | -0.002   | 0.002 |
| 5, 1, 5 <- 4, 1, 4                  | 11128.703 | 0.000    | 0.002 |
| 5, 0, 5 <- 4, 0, 4                  | 11162.935 | -0.001   | 0.002 |
| 5, 2, 4 <- 4, 2, 3                  | 11362.617 | -0.001   | 0.002 |
| 5, 3, 3 <- 4, 3, 2                  | 11443.138 | 0.000    | 0.002 |
| 5, 3, 2 <- 4, 3, 1                  | 11488.682 | -0.001   | 0.002 |
| 5, 1, 4 <- 4, 1, 3                  | 11514.459 | -0.001   | 0.002 |
| 5, 2, 3 <- 4, 2, 2                  | 11599.937 | -0.002   | 0.002 |
| 6, 1, 6 <- 5, 1, 5                  | 13331.410 | 0.001    | 0.002 |
| 6, 0, 6 <- 5, 0, 5                  | 13349.164 | -0.001   | 0.002 |
| 6, 2, 5 <- 5, 2, 4                  | 13604.411 | -0.001   | 0.002 |
| 6, 3, 4 <- 5, 3, 3                  | 13729.709 | 0.001    | 0.002 |
| 6, 4, 3 <- 5, 4, 2                  | 13741.014 | 0.002    | 0.002 |
| 6, 1, 5 <- 5, 1, 4                  | 13741.902 | -0.001   | 0.002 |
| 6, 4, 2 <- 5, 4, 1                  | 13749.988 | -0.001   | 0.002 |
| 6, 3, 3 <- 5, 3, 2                  | 13836.546 | 0.000    | 0.002 |
| 6, 2, 4 <- 5, 2, 3                  | 13929.050 | 0.003    | 0.002 |
| 7, 1, 7 <- 6, 1, 6                  | 15529.953 | 0.001    | 0.002 |
| 7, 0, 7 <- 6, 0, 6                  | 15538.285 | -0.002   | 0.002 |
| 7, 1, 6 <- 6, 1, 5                  | 15937.009 | 0.000    | 0.002 |
| 7, 2, 6 <- 6, 2, 5                  | 15833.025 | 0.000    | 0.002 |
| 7, 3, 5 <- 6, 3, 4                  | 16006.993 | 0.000    | 0.002 |
| 7, 5, 3 <- 6, 5, 2                  | 16027.668 | 0.000    | 0.002 |
| 7, 4, 4 <- 6, 4, 3                  | 16042.196 | 0.000    | 0.002 |
| 7, 4, 3 <- 6, 4, 2                  | 16070.315 | 0.002    | 0.002 |
| 7, 3, 4 <- 6, 3, 3                  | 16202.403 | 0.000    | 0.002 |
| 7, 2, 5 <- 6, 2, 4                  | 16229.825 | 0.001    | 0.002 |
| 8, 1, 8 <- 7, 1, 7                  | 17726.167 | 0.002    | 0.002 |
| 8, 0, 8 <- 7, 0, 7                  | 17729.837 | -0.001   | 0.002 |
| 8, 2, 7 <- 7, 2, 6                  | 18049.913 | 0.000    | 0.002 |
| 8, 1, 7 <- 7, 1, 6                  | 18116.163 | 0.000    | 0.002 |

|      |                                               |     |    |      |    |     |            |        |       |
|------|-----------------------------------------------|-----|----|------|----|-----|------------|--------|-------|
| 8,   | 3,                                            | 6   | <- | 7,   | 3, | 5   | 18271.529  | 0.000  | 0.002 |
| 8,   | 4,                                            | 4   | <- | 7,   | 4, | 3   | 18411.916  | 0.001  | 0.002 |
| 8,   | 2,                                            | 6   | <- | 7,   | 2, | 5   | 18493.913  | 0.000  | 0.002 |
| !    |                                               |     |    |      |    |     |            |        |       |
| !    | b-type transitions                            |     |    |      |    |     |            |        |       |
| !    |                                               |     |    |      |    |     |            |        |       |
| 4,   | 0,                                            | 4   | <- | 3,   | 1, | 3   | 8852.917   | 0.001  | 0.002 |
| 4,   | 1,                                            | 4   | <- | 3,   | 0, | 3   | 9042.281   | 0.000  | 0.002 |
| 4,   | 3,                                            | 2   | <- | 3,   | 2, | 1   | 10610.517  | -0.002 | 0.002 |
| 4,   | 3,                                            | 1   | <- | 3,   | 2, | 2   | 10711.909  | -0.001 | 0.002 |
| 5,   | 0,                                            | 5   | <- | 4,   | 1, | 4   | 11096.337  | 0.000  | 0.002 |
| 5,   | 1,                                            | 5   | <- | 4,   | 0, | 4   | 11195.302  | 0.000  | 0.002 |
| 4,   | 4,                                            | 0   | <- | 3,   | 3, | 1   | 11273.114  | -0.001 | 0.002 |
| 5,   | 2,                                            | 4   | <- | 4,   | 1, | 3   | 11893.772  | 0.001  | 0.002 |
| 5,   | 3,                                            | 3   | <- | 4,   | 2, | 2   | 12799.976  | 0.000  | 0.002 |
| 5,   | 3,                                            | 2   | <- | 4,   | 2, | 3   | 13092.830  | 0.000  | 0.002 |
| 6,   | 0,                                            | 6   | <- | 5,   | 1, | 5   | 13316.797  | -0.001 | 0.002 |
| 6,   | 1,                                            | 6   | <- | 5,   | 0, | 5   | 13363.776  | 0.001  | 0.002 |
| 5,   | 4,                                            | 2   | <- | 4,   | 3, | 1   | 13546.874  | -0.002 | 0.002 |
| 5,   | 4,                                            | 1   | <- | 4,   | 3, | 2   | 13565.521  | 0.002  | 0.002 |
| 5,   | 5,                                            | 1   | <- | 4,   | 4, | 0   | 14165.703  | 0.004  | 0.002 |
| 7,   | 0,                                            | 7   | <- | 6,   | 1, | 6   | 15523.677  | 0.002  | 0.002 |
| 7,   | 1,                                            | 7   | <- | 6,   | 0, | 6   | 15544.565  | 0.002  | 0.002 |
| 6,   | 4,                                            | 3   | <- | 5,   | 3, | 2   | 15799.206  | 0.000  | 0.002 |
| 6,   | 4,                                            | 2   | <- | 5,   | 3, | 3   | 15872.370  | -0.001 | 0.002 |
| !    |                                               |     |    |      |    |     |            |        |       |
| !    | c-type transitions                            |     |    |      |    |     |            |        |       |
| !    |                                               |     |    |      |    |     |            |        |       |
| 4,   | 2,                                            | 2   | <- | 3,   | 1, | 2   | 10012.805  | -0.001 | 0.002 |
| 4,   | 3,                                            | 1   | <- | 3,   | 2, | 1   | 10626.829  | -0.001 | 0.002 |
| 4,   | 3,                                            | 2   | <- | 3,   | 2, | 2   | 10695.597  | -0.001 | 0.002 |
| 5,   | 2,                                            | 3   | <- | 4,   | 1, | 3   | 12362.091  | 0.002  | 0.002 |
| 5,   | 3,                                            | 3   | <- | 4,   | 2, | 3   | 13030.972  | -0.002 | 0.003 |
| 5,   | 4,                                            | 2   | <- | 4,   | 3, | 2   | 13563.188  | 0.000  | 0.002 |
| 5,   | 4,                                            | 1   | <- | 4,   | 3, | 1   | 13549.209  | 0.002  | 0.002 |
| !    |                                               |     |    |      |    |     |            |        |       |
| !    | Room-temperature MMW spectra                  |     |    |      |    |     |            |        |       |
| !    |                                               |     |    |      |    |     |            |        |       |
| !    | a-type transitions in order of increasing K-1 |     |    |      |    |     |            |        |       |
| !    |                                               |     |    |      |    |     |            |        |       |
| 84,  | 0,                                            | 84  | <- | 83,  | 0, | 83  | 184420.458 | -0.005 | 0.050 |
| 85,  | 0,                                            | 85  | <- | 84,  | 0, | 84  | 186612.268 | -0.008 | 0.050 |
| 89,  | 0,                                            | 89  | <- | 88,  | 0, | 88  | 195379.026 | 0.071  | 0.050 |
| 90,  | 0,                                            | 90  | <- | 89,  | 0, | 89  | 197570.468 | -0.010 | 0.050 |
| 92,  | 0,                                            | 92  | <- | 91,  | 0, | 91  | 201953.327 | -0.016 | 0.050 |
| 93,  | 0,                                            | 93  | <- | 92,  | 0, | 92  | 204144.691 | 0.008  | 0.050 |
| 94,  | 0,                                            | 94  | <- | 93,  | 0, | 93  | 206335.936 | -0.026 | 0.050 |
| 97,  | 0,                                            | 97  | <- | 96,  | 0, | 96  | 212909.417 | -0.002 | 0.050 |
| 98,  | 0,                                            | 98  | <- | 97,  | 0, | 97  | 215100.473 | 0.031  | 0.050 |
| 101, | 0,                                            | 101 | <- | 100, | 0, | 100 | 221673.121 | 0.003  | 0.050 |
| 79,  | 1,                                            | 78  | <- | 78,  | 1, | 77  | 173807.258 | 0.003  | 0.050 |
| 84,  | 1,                                            | 83  | <- | 83,  | 1, | 82  | 184766.981 | -0.059 | 0.050 |
| 88,  | 1,                                            | 87  | <- | 87,  | 1, | 86  | 193533.909 | 0.051  | 0.050 |
| 89,  | 1,                                            | 88  | <- | 88,  | 1, | 87  | 195725.419 | 0.002  | 0.050 |
| 90,  | 1,                                            | 89  | <- | 89,  | 1, | 88  | 197916.901 | -0.015 | 0.050 |
| 94,  | 1,                                            | 93  | <- | 93,  | 1, | 92  | 206682.316 | 0.013  | 0.050 |
| 96,  | 1,                                            | 95  | <- | 95,  | 1, | 94  | 211064.666 | 0.044  | 0.050 |
| 79,  | 2,                                            | 77  | <- | 78,  | 2, | 76  | 174153.985 | -0.035 | 0.050 |
| 84,  | 2,                                            | 82  | <- | 83,  | 2, | 81  | 185113.747 | 0.062  | 0.050 |
| 88,  | 2,                                            | 86  | <- | 87,  | 2, | 85  | 193880.360 | -0.044 | 0.050 |
| 89,  | 2,                                            | 87  | <- | 88,  | 2, | 86  | 196071.950 | 0.012  | 0.050 |
| 96,  | 2,                                            | 94  | <- | 95,  | 2, | 93  | 211410.986 | 0.024  | 0.050 |
| 98,  | 2,                                            | 96  | <- | 97,  | 2, | 95  | 215792.978 | 0.009  | 0.050 |

|      |     |    |    |     |     |    |            |        |       |
|------|-----|----|----|-----|-----|----|------------|--------|-------|
| 100, | 2,  | 98 | <- | 99, | 2,  | 97 | 220174.734 | 0.020  | 0.050 |
| 84,  | 3,  | 81 | <- | 83, | 3,  | 80 | 185460.483 | 0.028  | 0.050 |
| 88,  | 3,  | 85 | <- | 87, | 3,  | 84 | 194226.986 | -0.077 | 0.050 |
| 95,  | 3,  | 92 | <- | 94, | 3,  | 91 | 209566.295 | -0.026 | 0.050 |
| 96,  | 3,  | 93 | <- | 95, | 3,  | 92 | 211757.410 | 0.017  | 0.050 |
| 79,  | 4,  | 75 | <- | 78, | 4,  | 74 | 174848.028 | -0.036 | 0.050 |
| 84,  | 4,  | 80 | <- | 83, | 4,  | 79 | 185807.441 | 0.022  | 0.050 |
| 89,  | 4,  | 85 | <- | 88, | 4,  | 84 | 196765.378 | 0.010  | 0.050 |
| 92,  | 4,  | 88 | <- | 91, | 4,  | 87 | 203339.417 | -0.008 | 0.050 |
| 93,  | 4,  | 89 | <- | 92, | 4,  | 88 | 205530.646 | -0.009 | 0.050 |
| 96,  | 4,  | 92 | <- | 95, | 4,  | 91 | 212103.945 | -0.020 | 0.050 |
| 84,  | 5,  | 79 | <- | 83, | 5,  | 78 | 186154.642 | -0.014 | 0.050 |
| 89,  | 5,  | 84 | <- | 88, | 5,  | 83 | 197112.356 | -0.047 | 0.050 |
| 93,  | 5,  | 88 | <- | 92, | 5,  | 87 | 205877.433 | -0.103 | 0.050 |
| 84,  | 6,  | 78 | <- | 83, | 6,  | 77 | 186502.276 | 0.019  | 0.050 |
| 93,  | 6,  | 87 | <- | 92, | 6,  | 86 | 206224.723 | 0.024  | 0.050 |
| 95,  | 6,  | 89 | <- | 94, | 6,  | 88 | 210606.767 | -0.038 | 0.050 |
| 78,  | 7,  | 71 | <- | 77, | 7,  | 70 | 173699.939 | -0.042 | 0.050 |
| 90,  | 7,  | 83 | <- | 89, | 7,  | 82 | 199998.787 | 0.009  | 0.050 |
| 93,  | 7,  | 86 | <- | 92, | 7,  | 85 | 206572.287 | 0.062  | 0.050 |
| 94,  | 7,  | 87 | <- | 93, | 7,  | 86 | 208763.260 | 0.006  | 0.050 |
| 98,  | 7,  | 91 | <- | 97, | 7,  | 90 | 217526.669 | -0.075 | 0.050 |
| 83,  | 8,  | 75 | <- | 82, | 8,  | 74 | 185007.470 | -0.028 | 0.050 |
| 87,  | 8,  | 79 | <- | 86, | 8,  | 78 | 193773.201 | -0.030 | 0.050 |
| 78,  | 9,  | 69 | <- | 77, | 9,  | 68 | 174399.382 | -0.043 | 0.050 |
| 83,  | 9,  | 74 | <- | 82, | 9,  | 73 | 185357.041 | 0.000  | 0.050 |
| 94,  | 9,  | 85 | <- | 93, | 9,  | 84 | 209459.614 | -0.014 | 0.050 |
| 95,  | 9,  | 86 | <- | 94, | 9,  | 85 | 211650.547 | 0.101  | 0.050 |
| 78,  | 10, | 68 | <- | 77, | 10, | 67 | 174750.767 | -0.018 | 0.050 |
| 83,  | 10, | 73 | <- | 82, | 10, | 72 | 185707.553 | 0.003  | 0.050 |
| 92,  | 10, | 82 | <- | 91, | 10, | 81 | 205427.188 | 0.025  | 0.050 |
| 83,  | 11, | 72 | <- | 82, | 11, | 71 | 186059.279 | 0.027  | 0.050 |
| 92,  | 11, | 81 | <- | 91, | 11, | 80 | 205777.402 | 0.031  | 0.050 |
| 96,  | 11, | 85 | <- | 95, | 11, | 84 | 214539.806 | -0.013 | 0.050 |
| 82,  | 12, | 70 | <- | 81, | 12, | 69 | 184221.534 | -0.070 | 0.050 |
| 83,  | 12, | 71 | <- | 82, | 12, | 70 | 186412.351 | -0.069 | 0.050 |
| 90,  | 12, | 79 | <- | 89, | 12, | 78 | 201395.880 | 0.025  | 0.050 |
| 92,  | 12, | 80 | <- | 91, | 12, | 79 | 206128.666 | 0.041  | 0.050 |
| 87,  | 13, | 74 | <- | 86, | 13, | 73 | 195529.190 | -0.036 | 0.050 |
| 88,  | 13, | 75 | <- | 87, | 13, | 74 | 197719.631 | -0.024 | 0.050 |
| 92,  | 13, | 79 | <- | 91, | 13, | 78 | 206481.112 | -0.028 | 0.050 |
| 77,  | 14, | 63 | <- | 76, | 14, | 62 | 173985.153 | 0.064  | 0.050 |
| 86,  | 14, | 72 | <- | 85, | 14, | 71 | 193694.704 | -0.041 | 0.050 |
| 82,  | 14, | 69 | <- | 81, | 14, | 68 | 184576.925 | 0.010  | 0.050 |
| 87,  | 14, | 73 | <- | 86, | 14, | 72 | 195884.830 | 0.003  | 0.050 |
| 89,  | 14, | 75 | <- | 88, | 14, | 74 | 200264.964 | -0.027 | 0.050 |
| 90,  | 14, | 76 | <- | 89, | 14, | 75 | 202455.045 | -0.019 | 0.050 |
| 92,  | 14, | 78 | <- | 91, | 14, | 77 | 206835.107 | -0.063 | 0.050 |
| 93,  | 14, | 79 | <- | 92, | 14, | 78 | 209025.210 | 0.015  | 0.050 |
| 95,  | 14, | 81 | <- | 94, | 14, | 80 | 213405.221 | 0.045  | 0.050 |
| 82,  | 15, | 67 | <- | 81, | 15, | 66 | 185295.037 | 0.004  | 0.050 |
| 88,  | 15, | 73 | <- | 87, | 15, | 72 | 198432.330 | 0.004  | 0.050 |

|                          |            |        |       |
|--------------------------|------------|--------|-------|
| 93, 15, 78 <- 92, 15, 77 | 209380.742 | 0.036  | 0.050 |
| 95, 15, 80 <- 94, 15, 79 | 213760.120 | 0.077  | 0.050 |
| 96, 15, 81 <- 95, 15, 80 | 215949.727 | 0.036  | 0.050 |
| 82, 16, 66 <- 81, 16, 65 | 185659.138 | 0.053  | 0.050 |
| 91, 16, 75 <- 90, 16, 74 | 205359.880 | 0.027  | 0.050 |
| 95, 16, 79 <- 94, 16, 78 | 214116.887 | 0.035  | 0.050 |
| 82, 17, 65 <- 81, 17, 64 | 186027.560 | -0.045 | 0.050 |
| 87, 17, 70 <- 86, 17, 69 | 196967.250 | -0.059 | 0.050 |
| 91, 17, 74 <- 90, 17, 73 | 205721.214 | 0.063  | 0.050 |
| 92, 17, 76 <- 91, 17, 75 | 207549.105 | 0.027  | 0.050 |
| 94, 17, 77 <- 93, 17, 76 | 212287.211 | -0.009 | 0.050 |
| 81, 18, 63 <- 80, 18, 62 | 184215.859 | -0.011 | 0.050 |
| 82, 18, 64 <- 81, 18, 63 | 186401.746 | -0.050 | 0.050 |
| 87, 18, 69 <- 86, 18, 68 | 197335.540 | 0.029  | 0.050 |
| 91, 18, 73 <- 90, 18, 72 | 206085.853 | 0.007  | 0.050 |
| 93, 18, 75 <- 92, 18, 74 | 210461.753 | 0.027  | 0.050 |
| 94, 18, 76 <- 93, 18, 75 | 212649.776 | -0.020 | 0.050 |
| 98, 18, 80 <- 97, 18, 79 | 221402.679 | -0.016 | 0.050 |
| 81, 19, 62 <- 80, 19, 61 | 184599.365 | -0.067 | 0.050 |
| 86, 19, 67 <- 85, 19, 66 | 195523.126 | -0.013 | 0.050 |
| 87, 19, 68 <- 86, 19, 67 | 197709.028 | 0.065  | 0.050 |
| 91, 19, 72 <- 90, 19, 71 | 206454.660 | -0.055 | 0.050 |
| 93, 19, 74 <- 92, 19, 73 | 210828.764 | 0.041  | 0.050 |
| 76, 20, 57 <- 75, 20, 56 | 173689.893 | -0.013 | 0.050 |
| 81, 20, 61 <- 80, 20, 60 | 184993.412 | -0.086 | 0.050 |
| 88, 20, 68 <- 87, 20, 67 | 200273.414 | -0.061 | 0.050 |
| 89, 20, 69 <- 88, 20, 68 | 202458.246 | -0.004 | 0.050 |
| 91, 20, 71 <- 90, 20, 70 | 206828.780 | 0.019  | 0.050 |
| 92, 20, 72 <- 91, 20, 71 | 209014.390 | -0.041 | 0.050 |
| 94, 20, 74 <- 93, 20, 73 | 213386.495 | 0.035  | 0.050 |
| 76, 21, 55 <- 75, 21, 54 | 174551.608 | 0.110  | 0.050 |
| 76, 21, 56 <- 75, 21, 55 | 174103.739 | 0.069  | 0.050 |
| 92, 21, 71 <- 91, 21, 70 | 209393.284 | -0.043 | 0.050 |
| 94, 21, 73 <- 93, 21, 72 | 213762.353 | -0.035 | 0.050 |
| 95, 21, 74 <- 94, 21, 73 | 215947.366 | -0.001 | 0.050 |
| 97, 21, 76 <- 96, 21, 75 | 220318.054 | -0.021 | 0.050 |
| 76, 22, 55 <- 75, 22, 54 | 174538.905 | 0.108  | 0.050 |
| 90, 22, 68 <- 89, 22, 67 | 205416.994 | -0.017 | 0.050 |
| 94, 22, 72 <- 93, 22, 71 | 214145.075 | -0.022 | 0.050 |
| 95, 22, 73 <- 94, 22, 72 | 216328.298 | -0.028 | 0.050 |
| 97, 22, 75 <- 96, 22, 74 | 220695.951 | 0.051  | 0.050 |
| 81, 23, 59 <- 80, 23, 58 | 185829.202 | 0.013  | 0.050 |
| 90, 23, 67 <- 89, 23, 66 | 205820.108 | -0.073 | 0.050 |
| 91, 23, 68 <- 90, 23, 67 | 207997.934 | -0.035 | 0.050 |
| 94, 23, 71 <- 93, 23, 70 | 214536.470 | 0.012  | 0.050 |
| 95, 23, 72 <- 94, 23, 71 | 216717.364 | 0.018  | 0.050 |
| 97, 23, 74 <- 96, 23, 73 | 221080.849 | 0.072  | 0.050 |
| 75, 24, 51 <- 74, 24, 50 | 174632.860 | -0.092 | 0.050 |
| 86, 24, 62 <- 85, 24, 61 | 197571.755 | -0.036 | 0.050 |
| 90, 24, 67 <- 89, 24, 66 | 205820.108 | 0.018  | 0.050 |
| 92, 24, 68 <- 91, 24, 67 | 210586.761 | -0.095 | 0.050 |
| 95, 24, 71 <- 94, 24, 70 | 217116.770 | -0.031 | 0.050 |
| 75, 25, 50 <- 74, 25, 49 | 174786.977 | -0.058 | 0.050 |
| 80, 25, 56 <- 79, 25, 55 | 184570.320 | -0.050 | 0.050 |
| 86, 25, 62 <- 85, 25, 61 | 197562.851 | -0.017 | 0.050 |

|                                  |            |        |       |
|----------------------------------|------------|--------|-------|
| 92, 25, 67 <- 91, 25, 66         | 211016.164 | -0.007 | 0.050 |
| 92, 25, 68 <- 91, 25, 67         | 210586.761 | 0.104  | 0.050 |
| 95, 25, 70 <- 94, 25, 69         | 217530.175 | -0.033 | 0.050 |
| 75, 26, 49 <- 74, 26, 48         | 174128.490 | -0.098 | 0.050 |
| 84, 26, 59 <- 83, 26, 58         | 193701.891 | -0.060 | 0.050 |
| 90, 26, 65 <- 89, 26, 64         | 206679.341 | -0.033 | 0.050 |
| 92, 26, 67 <- 91, 26, 66         | 211014.642 | 0.007  | 0.050 |
| 93, 26, 68 <- 92, 26, 67         | 213184.806 | -0.094 | 0.050 |
| 95, 26, 69 <- 94, 26, 68         | 217963.380 | -0.057 | 0.050 |
| 93, 27, 66 <- 92, 27, 65         | 214134.340 | 0.034  | 0.050 |
| 93, 27, 67 <- 92, 27, 66         | 213629.530 | 0.087  | 0.050 |
| 94, 27, 68 <- 93, 27, 67         | 215794.744 | 0.094  | 0.050 |
| 95, 27, 69 <- 94, 27, 68         | 217961.860 | 0.100  | 0.050 |
| 96, 27, 69 <- 95, 27, 68         | 220585.640 | 0.037  | 0.050 |
| 92, 28, 64 <- 91, 28, 63         | 212693.454 | -0.020 | 0.050 |
| 93, 28, 66 <- 92, 28, 65         | 214099.433 | -0.072 | 0.050 |
| 94, 28, 67 <- 93, 28, 66         | 216257.904 | -0.001 | 0.050 |
| 96, 28, 69 <- 95, 28, 68         | 220579.477 | 0.046  | 0.050 |
| 96, 28, 68 <- 95, 28, 67         | 221091.209 | -0.023 | 0.050 |
| 96, 29, 68 <- 95, 29, 67         | 221054.277 | 0.022  | 0.050 |
| 96, 29, 67 <- 95, 29, 66         | 221723.856 | -0.044 | 0.050 |
| 93, 30, 63 <- 92, 30, 62         | 216637.468 | -0.023 | 0.050 |
| 96, 30, 67 <- 95, 30, 66         | 221539.911 | 0.080  | 0.050 |
| !                                |            |        |       |
| ! high-K sequences for a given J |            |        |       |
| !                                |            |        |       |
| 76, 31, 46 <- 75, 31, 45         | 175020.931 | 0.039  | 0.050 |
| 76, 33, 44 <- 75, 33, 43         | 174796.444 | -0.010 | 0.050 |
| 76, 35, 41 <- 75, 35, 40         | 174624.709 | 0.039  | 0.050 |
| 76, 36, 40 <- 75, 36, 39         | 174552.600 | 0.053  | 0.050 |
| 76, 39, 37 <- 75, 39, 36         | 174375.092 | -0.031 | 0.050 |
| 76, 41, 35 <- 75, 41, 34         | 174280.857 | -0.065 | 0.050 |
| 76, 44, 32 <- 75, 44, 31         | 174164.936 | -0.044 | 0.050 |
| 76, 45, 31 <- 75, 45, 30         | 174131.664 | 0.003  | 0.050 |
| 76, 46, 30 <- 75, 46, 29         | 174100.560 | 0.005  | 0.050 |
| 76, 47, 29 <- 75, 47, 28         | 174071.384 | -0.060 | 0.050 |
| 76, 48, 28 <- 75, 48, 27         | 174044.169 | 0.030  | 0.050 |
| 76, 50, 26 <- 75, 50, 25         | 173994.312 | 0.015  | 0.050 |
| 86, 38, 48 <- 85, 38, 47         | 197711.285 | -0.029 | 0.050 |
| 87, 36, 52 <- 86, 36, 51         | 200262.883 | 0.058  | 0.050 |
| 93, 38, 56 <- 92, 38, 55         | 214118.315 | 0.094  | 0.050 |
| 93, 43, 50 <- 92, 43, 49         | 213627.552 | 0.038  | 0.050 |

---

Table S2. The observed and the obs.-calc. frequencies (MHz) of measured rotational transitions in the ground states of singly substituted  $^{13}\text{C}$  and the  $^{18}\text{O}$  isotopomer of camphor.

|                | 13C.1      |         | 13C.2      |         | 13C.3      |         |
|----------------|------------|---------|------------|---------|------------|---------|
| 4 1 4 <- 3 1 3 | 8913.5934  | 0.0001  | 8882.4569  | -0.0001 | 8877.0557  | -0.0003 |
| 4 0 4 <- 3 0 3 | 8969.4788  | -0.0005 | 8939.8532  | 0.0004  | 8931.6100  | -0.0001 |
| 4 1 3 <- 3 1 2 | 9243.5572  | -0.0006 | 9210.9904  | -0.0011 | 9210.6792  | 0.0001  |
| 5 1 5 <- 4 1 4 | 11121.3622 | 0.0003  | 11082.8447 | -0.0001 | 11075.1096 | 0.0001  |
| 5 0 5 <- 4 0 4 | 11155.3906 | -0.0001 | 11118.4356 | -0.0006 | 11107.6550 | 0.0002  |
| 5 2 4 <- 4 2 3 |            |         | 11314.4014 | 0.0010  |            |         |
| 5 1 4 <- 4 1 3 | 11505.6837 | 0.0007  | 11466.7858 | 0.0004  | 11462.1930 | -0.0001 |
| 5 2 3 <- 4 2 2 |            |         |            |         |            |         |
|                | 13C.4      |         | 13C.5      |         | 13C.6      |         |
| 4 1 4 <- 3 1 3 | 8884.9285  | 0.0004  | 8857.1101  | -0.0006 | 8902.9231  | 0.0000  |
| 4 0 4 <- 3 0 3 | 8939.7075  | -0.0002 | 8910.0307  | 0.0002  | 8958.2303  | -0.0005 |
| 4 1 3 <- 3 1 2 | 9223.8052  | 0.0001  | 9205.3622  | -0.0008 | 9210.6284  | -0.0005 |
| 5 1 5 <- 4 1 4 | 11084.5003 | -0.0005 | 11048.5143 | 0.0014  | 11109.9860 | 0.0003  |
| 5 0 5 <- 4 0 4 | 11116.9647 | 0.0003  | 11078.7857 | -0.0012 | 11144.8668 | -0.0001 |
| 5 2 4 <- 4 2 3 |            |         |            |         |            |         |
| 5 1 4 <- 4 1 3 | 11477.1778 | -0.0001 | 11449.2445 | 0.0008  | 11470.6757 | 0.0006  |
| 5 2 3 <- 4 2 2 |            |         |            |         |            |         |
|                | 13C.7      |         | 13C.8      |         | 13C.9      |         |
| 4 1 4 <- 3 1 3 | 8900.4646  | -0.0018 | 8874.9098  | -0.0011 | 8810.4628  | -0.0010 |
| 4 0 4 <- 3 0 3 | 8957.0875  | 0.0012  | 8929.5507  | -0.0001 | 8869.6392  | -0.0004 |
| 4 1 3 <- 3 1 2 | 9229.5774  | 0.0008  | 9188.2048  | 0.0006  | 9138.5086  | 0.0000  |
| 5 1 5 <- 4 1 4 | 11105.1653 | 0.0011  | 11074.3342 | 0.0006  | 10993.2166 | 0.0009  |
| 5 0 5 <- 4 0 4 | 11139.9575 | -0.0004 | 11108.1823 | 0.0004  | 11030.6167 | 0.0001  |
| 5 2 4 <- 4 2 3 |            |         |            |         |            |         |
| 5 1 4 <- 4 1 3 | 11489.1410 | -0.0009 | 11440.3952 | -0.0005 | 11377.8924 | 0.0001  |
| 5 2 3 <- 4 2 2 | 11571.8250 | 0.0001  |            |         |            |         |
|                | 13C.10     |         | 18O        |         |            |         |
| 4 1 4 <- 3 1 3 | 8851.7065  | 0.0008  | 8676.1001  | 0.0001  |            |         |
| 4 0 4 <- 3 0 3 | 8903.6811  | -0.0014 | 8739.7319  | 0.0010  |            |         |
| 4 1 3 <- 3 1 2 | 9200.0693  | -0.0013 | 8992.0243  | -0.0012 |            |         |
| 5 1 5 <- 4 1 4 | 11041.5724 | 0.0003  | 10827.1650 | 0.0005  |            |         |
| 5 0 5 <- 4 0 4 | 11071.0013 | -0.0002 | 10870.1739 | -0.0015 |            |         |
| 5 2 4 <- 4 2 3 |            |         |            |         |            |         |
| 5 1 4 <- 4 1 3 | 11441.5918 | 0.0015  | 11201.8184 | 0.0010  |            |         |
| 5 2 3 <- 4 2 2 |            |         |            |         |            |         |

Table S3. The results of fitting the r0 geometry of the camphor molecule.

---

CAMPHOR, standard bond type declaration starting at the oxygen

---

!  
! CH bonds from [MP2+(1/4)(MP2-HF)]/6-31G\*\* rounded to nearest 0.001A  
!

NUMBER OF ATOMS = 27

| NO | NA | NB | NC | NO.NA    | NO.NA.NB   | NO.NA.NB.NC | MASS       | Fig.1   |
|----|----|----|----|----------|------------|-------------|------------|---------|
| 1  | 0  | 0  | 0  | 0.000000 | 0.000000   | 0.000000    | 15.9949150 | = O     |
| 2  | 1  | 0  | 0  | 1.225510 | 0.000000   | 0.000000    | 12.0000000 | = C2    |
| 3  | 2  | 1  | 0  | 1.527410 | 126.634000 | 0.000000    | 12.0000000 | = C1    |
| 4  | 2  | 1  | 3  | 1.535990 | 126.648000 | -179.703000 | 12.0000000 | = C3    |
| 5  | 3  | 2  | 1  | 1.513010 | 113.903000 | 16.919000   | 12.0000000 | = C10   |
| 6  | 4  | 2  | 5  | 1.537890 | 101.432000 | -13.656000  | 12.0000000 | = C4    |
| 7  | 3  | 2  | 1  | 1.557260 | 100.279000 | 145.912000  | 12.0000000 | = C7    |
| 8  | 3  | 2  | 4  | 1.555860 | 103.308000 | 70.849000   | 12.0000000 | = C6    |
| 9  | 6  | 4  | 2  | 1.542350 | 106.544000 | -72.288000  | 12.0000000 | = C5    |
| 10 | 7  | 3  | 5  | 1.529750 | 114.152000 | -63.350000  | 12.0000000 | = C9    |
| 11 | 7  | 3  | 5  | 1.532870 | 112.976000 | 60.464000   | 12.0000000 | = C8    |
| 12 | 5  | 3  | 7  | 1.091000 | 109.923000 | -175.885000 | 1.0078250  | = H10   |
| 13 | 5  | 3  | 7  | 1.092000 | 111.058000 | -57.139000  | 1.0078250  | = H10'  |
| 14 | 5  | 3  | 7  | 1.091000 | 111.020000 | 63.929000   | 1.0078250  | = H10'' |
| 15 | 6  | 7  | 3  | 1.094000 | 114.822000 | 179.918000  | 1.0078250  | = H4    |
| 16 | 4  | 2  | 1  | 1.093000 | 109.684000 | -60.094000  | 1.0078250  | = H3    |
| 17 | 4  | 2  | 1  | 1.093000 | 110.784000 | 58.298000   | 1.0078250  | = H3'   |
| 18 | 9  | 8  | 3  | 1.092000 | 111.577000 | -117.360000 | 1.0078250  | = H5    |
| 19 | 9  | 8  | 3  | 1.092000 | 112.432000 | 122.331000  | 1.0078250  | = H5'   |
| 20 | 8  | 9  | 6  | 1.093000 | 112.976000 | -118.360000 | 1.0078250  | = H8    |
| 21 | 8  | 9  | 6  | 1.093000 | 111.963000 | 120.812000  | 1.0078250  | = H8'   |
| 22 | 10 | 7  | 3  | 1.093000 | 109.716000 | -172.169000 | 1.0078250  | = H9    |
| 23 | 10 | 7  | 3  | 1.092000 | 110.291000 | 69.501000   | 1.0078250  | = H9'   |
| 24 | 10 | 7  | 3  | 1.089000 | 113.430000 | -51.530000  | 1.0078250  | = H9''  |
| 25 | 11 | 7  | 3  | 1.092000 | 110.113000 | -73.539000  | 1.0078250  | = H8    |
| 26 | 11 | 7  | 3  | 1.091000 | 110.221000 | 167.908000  | 1.0078250  | = H8'   |
| 27 | 11 | 7  | 3  | 1.091000 | 113.378000 | 46.667000   | 1.0078250  | = H8''  |

---

FINAL RESULTS OF LEAST SQUARES FIT:

|               |            |    |                      |
|---------------|------------|----|----------------------|
| R( 3, 2) =    | 1.537218   | +- | 0.010057             |
| R( 8, 3) =    | 1.556614   | +- | 0.006475             |
| R( 7, 3) =    | 1.543110   | +- | 0.008138             |
| R( 5, 3) =    | 1.522034   | +- | 0.004230             |
| R( 4, 2) =    | 1.530026   | +- | 0.003172             |
| R( 2, 1) =    | 1.211770   | +- | 0.001928             |
| R( 6, 4) =    | 1.545123   | +- | 0.004628             |
| R( 9, 6) =    | 1.547273   | +- | 0.005066             |
| R(11, 7) =    | 1.541599   | +- | 0.006274             |
| R(10, 7) =    | 1.533933   | +- | 0.005165             |
| A( 8, 3, 2) = | 102.642355 | +- | 0.568250             |
| A( 7, 3, 2) = | 100.575787 | +- | 0.320322             |
| A( 5, 3, 2) = | 113.584933 | +- | 0.598621             |
| A( 3, 2, 1) = | 126.797759 | +- | 0.119454 and at N= 4 |
| A( 6, 4, 2) = | 101.589863 | +- | 0.139150             |
| A( 9, 6, 4) = | 106.477130 | +- | 0.283261             |

A(11, 7, 3) = 113.178305 +- 0.448844  
 A(10, 7, 3) = 114.089163 +- 0.590623  
 D( 4, 2, 1, 3) = [-180.000000 ] FIXED  
 D( 5, 3, 2, 1) = 16.290487 +- 0.376402  
 D( 6, 4, 2, 5) = -13.447286 +- 0.333432  
 D( 7, 3, 2, 1) = 145.687415 +- 0.385646  
 D( 8, 3, 2, 4) = 71.733595 +- 0.415969  
 D( 9, 6, 4, 2) = -72.331892 +- 0.188970  
 D(10, 7, 3, 5) = -62.943704 +- 0.841068  
 D(11, 7, 3, 5) = 60.414052 +- 0.816670

Chi-squared = 0.0004792367  
 Deviation of fit = 0.006601

| Ni | Axis | Iobs      | Icalc     | Io-c     | Bobs      | Bcalc     | Bo-c    |
|----|------|-----------|-----------|----------|-----------|-----------|---------|
| 1  | a    | 349.26740 | 349.25827 | 0.00913  | 1446.9687 | 1447.0066 | -0.0378 |
| 1  | b    | 427.06864 | 427.05737 | 0.01128  | 1183.3672 | 1183.3984 | -0.0313 |
| 1  | c    | 460.64947 | 460.63742 | 0.01205  | 1097.1010 | 1097.1297 | -0.0287 |
| 2  | a    | 349.81540 | 349.81435 | 0.00105  | 1444.7020 | 1444.7063 | -0.0043 |
| 2  | b    | 427.42002 | 427.42251 | -0.00249 | 1182.3943 | 1182.3874 | 0.0069  |
| 2  | c    | 460.93292 | 460.93467 | -0.00175 | 1096.4264 | 1096.4222 | 0.0042  |
| 3  | a    | 349.53692 | 349.53833 | -0.00141 | 1445.8530 | 1445.8472 | 0.0058  |
| 3  | b    | 428.11826 | 428.11937 | -0.00111 | 1180.4659 | 1180.4629 | 0.0031  |
| 3  | c    | 461.61293 | 461.61362 | -0.00069 | 1094.8112 | 1094.8096 | 0.0016  |
| 4  | a    | 349.33291 | 349.33268 | 0.00023  | 1446.6974 | 1446.6984 | -0.0010 |
| 4  | b    | 429.01885 | 429.02092 | -0.00208 | 1177.9879 | 1177.9822 | 0.0057  |
| 4  | c    | 462.55951 | 462.56003 | -0.00052 | 1092.5708 | 1092.5696 | 0.0012  |
| 5  | a    | 351.09245 | 351.09254 | -0.00009 | 1439.4471 | 1439.4467 | 0.0004  |
| 5  | b    | 427.92503 | 427.92594 | -0.00091 | 1180.9990 | 1180.9964 | 0.0025  |
| 5  | c    | 462.62203 | 462.62346 | -0.00143 | 1092.4231 | 1092.4198 | 0.0034  |
| 6  | a    | 352.28505 | 352.29122 | -0.00617 | 1434.5741 | 1434.5490 | 0.0251  |
| 6  | b    | 429.71854 | 429.71543 | 0.00312  | 1176.0698 | 1176.0783 | -0.0085 |
| 6  | c    | 461.02078 | 461.01911 | 0.00168  | 1096.2174 | 1096.2214 | -0.0040 |
| 7  | a    | 351.96995 | 351.96976 | 0.00019  | 1435.8584 | 1435.8592 | -0.0008 |
| 7  | b    | 428.70905 | 428.71092 | -0.00187 | 1178.8391 | 1178.8340 | 0.0051  |
| 7  | c    | 462.92552 | 462.92706 | -0.00154 | 1091.7070 | 1091.7033 | 0.0036  |
| 8  | a    | 352.93834 | 352.94076 | -0.00242 | 1431.9187 | 1431.9089 | 0.0098  |
| 8  | b    | 428.30476 | 428.30691 | -0.00216 | 1179.9519 | 1179.9460 | 0.0059  |
| 8  | c    | 464.28135 | 464.28152 | -0.00017 | 1088.5189 | 1088.5185 | 0.0004  |
| 9  | a    | 353.47250 | 353.47477 | -0.00227 | 1429.7548 | 1429.7456 | 0.0092  |
| 9  | b    | 430.50686 | 430.50814 | -0.00129 | 1173.9163 | 1173.9128 | 0.0035  |
| 9  | c    | 462.60958 | 462.61076 | -0.00118 | 1092.4525 | 1092.4498 | 0.0028  |
| 10 | a    | 353.97913 | 353.97840 | 0.00073  | 1427.7085 | 1427.7114 | -0.0029 |
| 10 | b    | 428.48865 | 428.49063 | -0.00198 | 1179.4455 | 1179.4400 | 0.0055  |
| 10 | c    | 464.56314 | 464.56537 | -0.00223 | 1087.8586 | 1087.8534 | 0.0052  |
| 11 | a    | 349.69389 | 349.69191 | 0.00198  | 1445.2040 | 1445.2122 | -0.0082 |
| 11 | b    | 432.44121 | 432.44074 | 0.00047  | 1168.6652 | 1168.6665 | -0.0013 |
| 11 | c    | 466.40846 | 466.41176 | -0.00330 | 1083.5546 | 1083.5469 | 0.0077  |
| 12 | a    | 349.44013 | 349.44103 | -0.00090 | 1446.2535 | 1446.2498 | 0.0037  |
| 12 | b    | 439.97008 | 439.97094 | -0.00085 | 1148.6668 | 1148.6645 | 0.0022  |
| 12 | c    | 473.53027 | 473.53111 | -0.00085 | 1067.2581 | 1067.2562 | 0.0019  |

Correlation coefficients:

|    | 1        | 2      | 3      | 4      | 5      | 6      | 7      | 8      |       |
|----|----------|--------|--------|--------|--------|--------|--------|--------|-------|
| 1: | R( 3, 2) | 1.000  |        |        |        |        |        |        |       |
| 2: | R( 8, 3) | -0.363 | 1.000  |        |        |        |        |        |       |
| 3: | R( 7, 3) | -0.744 | 0.114  | 1.000  |        |        |        |        |       |
| 4: | R( 5, 3) | -0.074 | -0.562 | -0.146 | 1.000  |        |        |        |       |
| 5: | R( 4, 2) | -0.511 | 0.283  | 0.367  | -0.099 | 1.000  |        |        |       |
| 6: | R( 2, 1) | 0.026  | -0.236 | -0.083 | 0.200  | -0.542 | 1.000  |        |       |
| 7: | R( 6, 4) | 0.262  | -0.147 | -0.128 | -0.009 | -0.397 | 0.207  | 1.000  |       |
| 8: | R( 9, 6) | -0.133 | 0.203  | 0.004  | -0.013 | 0.130  | -0.029 | -0.467 | 1.000 |



|     |                |        |        |        |        |        |        |        |        |
|-----|----------------|--------|--------|--------|--------|--------|--------|--------|--------|
| 9:  | R(11, 7)       | 0.084  | -0.011 | -0.196 | -0.060 | -0.044 | 0.005  | -0.022 | 0.130  |
| 10: | R(10, 7)       | 0.005  | 0.080  | 0.192  | -0.032 | 0.002  | -0.015 | 0.194  | -0.064 |
| 11: | A( 8, 3, 2)    | -0.818 | -0.046 | 0.702  | 0.321  | 0.387  | -0.074 | -0.293 | 0.090  |
| 12: | A( 7, 3, 2)    | -0.521 | 0.310  | -0.073 | 0.322  | 0.437  | -0.160 | -0.356 | 0.213  |
| 13: | A( 5, 3, 2)    | -0.906 | 0.520  | 0.739  | -0.272 | 0.453  | -0.108 | -0.148 | 0.053  |
| 14: | A( 3, 2, 1)    | 0.587  | -0.367 | -0.612 | 0.435  | 0.033  | -0.347 | -0.080 | -0.029 |
| 15: | A( 6, 4, 2)    | 0.141  | -0.020 | -0.146 | 0.027  | -0.101 | -0.376 | -0.390 | 0.366  |
| 16: | A( 9, 6, 4)    | -0.001 | -0.060 | 0.000  | 0.009  | 0.110  | -0.060 | -0.289 | -0.479 |
| 17: | A(11, 7, 3)    | 0.266  | -0.478 | -0.312 | 0.361  | -0.158 | 0.132  | 0.002  | -0.178 |
| 18: | A(10, 7, 3)    | -0.508 | 0.160  | 0.051  | 0.080  | 0.303  | -0.052 | -0.327 | 0.114  |
| 19: | D( 5, 3, 2, 1) | -0.493 | -0.412 | 0.622  | 0.252  | 0.294  | 0.004  | -0.139 | -0.029 |
| 20: | D( 6, 4, 2, 5) | 0.183  | 0.157  | -0.240 | -0.121 | -0.170 | 0.039  | -0.011 | 0.375  |
| 21: | D( 7, 3, 2, 1) | -0.113 | 0.664  | 0.128  | -0.571 | 0.138  | -0.202 | 0.016  | 0.148  |
| 22: | D( 8, 3, 2, 4) | 0.720  | -0.280 | -0.753 | 0.241  | -0.328 | 0.095  | 0.291  | -0.214 |
| 23: | D( 9, 6, 4, 2) | -0.218 | 0.016  | 0.175  | 0.068  | 0.156  | -0.118 | -0.214 | -0.004 |
| 24: | D(10, 7, 3, 5) | -0.613 | 0.552  | 0.486  | -0.257 | 0.333  | -0.154 | -0.064 | 0.125  |
| 25: | D(11, 7, 3, 5) | -0.771 | 0.443  | 0.315  | -0.017 | 0.468  | -0.118 | -0.268 | 0.076  |

|   |    |    |    |    |    |    |    |
|---|----|----|----|----|----|----|----|
| 9 | 10 | 11 | 12 | 13 | 14 | 15 | 16 |
|---|----|----|----|----|----|----|----|

|     |                |        |        |        |        |        |        |        |        |
|-----|----------------|--------|--------|--------|--------|--------|--------|--------|--------|
| 9:  | R(11, 7)       | 1.000  |        |        |        |        |        |        |        |
| 10: | R(10, 7)       | -0.571 | 1.000  |        |        |        |        |        |        |
| 11: | A( 8, 3, 2)    | -0.091 | -0.081 | 1.000  |        |        |        |        |        |
| 12: | A( 7, 3, 2)    | 0.212  | -0.525 | 0.367  | 1.000  |        |        |        |        |
| 13: | A( 5, 3, 2)    | -0.024 | -0.045 | 0.620  | 0.380  | 1.000  |        |        |        |
| 14: | A( 3, 2, 1)    | 0.016  | 0.055  | -0.420 | 0.056  | -0.715 | 1.000  |        |        |
| 15: | A( 6, 4, 2)    | 0.038  | -0.056 | -0.077 | 0.106  | -0.140 | 0.419  | 1.000  |        |
| 16: | A( 9, 6, 4)    | -0.022 | -0.100 | 0.000  | 0.026  | 0.004  | 0.019  | -0.223 | 1.000  |
| 17: | A(11, 7, 3)    | -0.627 | 0.161  | -0.025 | -0.111 | -0.405 | 0.280  | 0.052  | 0.063  |
| 18: | A(10, 7, 3)    | 0.396  | -0.762 | 0.474  | 0.769  | 0.498  | -0.293 | 0.013  | 0.094  |
| 19: | D( 5, 3, 2, 1) | -0.068 | -0.059 | 0.688  | 0.022  | 0.355  | -0.329 | -0.116 | 0.143  |
| 20: | D( 6, 4, 2, 5) | 0.101  | -0.029 | -0.306 | 0.020  | -0.087 | 0.176  | 0.305  | -0.576 |
| 21: | D( 7, 3, 2, 1) | 0.501  | 0.021  | -0.176 | -0.021 | 0.303  | -0.285 | -0.083 | 0.046  |
| 22: | D( 8, 3, 2, 4) | 0.088  | 0.073  | -0.760 | -0.117 | -0.729 | 0.705  | 0.059  | 0.147  |
| 23: | D( 9, 6, 4, 2) | -0.011 | -0.075 | 0.295  | 0.131  | 0.132  | -0.141 | 0.134  | 0.456  |
| 24: | D(10, 7, 3, 5) | 0.499  | -0.110 | 0.347  | 0.302  | 0.700  | -0.435 | -0.095 | -0.008 |
| 25: | D(11, 7, 3, 5) | 0.112  | -0.478 | 0.527  | 0.827  | 0.778  | -0.408 | -0.027 | 0.040  |

|    |    |    |    |    |    |    |    |
|----|----|----|----|----|----|----|----|
| 17 | 18 | 19 | 20 | 21 | 22 | 23 | 24 |
|----|----|----|----|----|----|----|----|

|     |                |        |        |        |        |        |        |       |       |
|-----|----------------|--------|--------|--------|--------|--------|--------|-------|-------|
| 17: | A(11, 7, 3)    | 1.000  |        |        |        |        |        |       |       |
| 18: | A(10, 7, 3)    | -0.105 | 1.000  |        |        |        |        |       |       |
| 19: | D( 5, 3, 2, 1) | 0.167  | 0.256  | 1.000  |        |        |        |       |       |
| 20: | D( 6, 4, 2, 5) | -0.110 | -0.059 | -0.612 | 1.000  |        |        |       |       |
| 21: | D( 7, 3, 2, 1) | -0.865 | -0.028 | -0.284 | -0.054 | 1.000  |        |       |       |
| 22: | D( 8, 3, 2, 4) | 0.152  | -0.407 | -0.467 | 0.025  | -0.053 | 1.000  |       |       |
| 23: | D( 9, 6, 4, 2) | -0.021 | 0.178  | 0.424  | -0.738 | 0.147  | -0.123 | 1.000 |       |
| 24: | D(10, 7, 3, 5) | -0.861 | 0.332  | 0.003  | 0.082  | 0.727  | -0.437 | 0.057 | 1.000 |
| 25: | D(11, 7, 3, 5) | -0.200 | 0.846  | 0.214  | -0.025 | 0.064  | -0.504 | 0.120 | 0.492 |

25

|     |                |       |
|-----|----------------|-------|
| 25: | D(11, 7, 3, 5) | 1.000 |
|-----|----------------|-------|

Final principal coordinates of parent:

| ATOM NO. | A         | B         | C         | MASS       |
|----------|-----------|-----------|-----------|------------|
| 1        | -2.547204 | 0.187936  | -0.213755 | 15.9949150 |
| 2        | -1.382858 | -0.147379 | -0.229486 | 12.0000000 |
| 3        | -0.230760 | 0.488337  | 0.565230  | 12.0000000 |
| 4        | -0.768352 | -1.287324 | -1.044279 | 12.0000000 |
| 5        | -0.563049 | 1.864528  | 1.124041  | 12.0000000 |
| 6        | 0.716269  | -1.203805 | -0.624360 | 12.0000000 |

|    |           |           |           |            |
|----|-----------|-----------|-----------|------------|
| 7  | 0.929548  | 0.325749  | -0.438982 | 12.0000000 |
| 8  | 0.080929  | -0.594841 | 1.638832  | 12.0000000 |
| 9  | 0.791379  | -1.728570 | 0.829268  | 12.0000000 |
| 10 | 2.305990  | 0.692768  | 0.129924  | 12.0000000 |
| 11 | 0.730586  | 1.139634  | -1.733020 | 12.0000000 |
| 12 | -1.449798 | 1.804649  | 1.756791  | 1.0078250  |
| 13 | -0.781306 | 2.571791  | 0.321167  | 1.0078250  |
| 14 | 0.263569  | 2.255213  | 1.719313  | 1.0078250  |
| 15 | 1.413749  | -1.684160 | -1.316904 | 1.0078250  |
| 16 | -0.928638 | -1.106018 | -2.110152 | 1.0078250  |
| 17 | -1.245108 | -2.239900 | -0.799431 | 1.0078250  |
| 18 | 1.816886  | -1.883799 | 1.170885  | 1.0078250  |
| 19 | 0.276292  | -2.687598 | 0.915376  | 1.0078250  |
| 20 | -0.817893 | -0.939327 | 2.156614  | 1.0078250  |
| 21 | 0.738119  | -0.159990 | 2.396232  | 1.0078250  |
| 22 | 3.085409  | 0.421803  | -0.586828 | 1.0078250  |
| 23 | 2.371705  | 1.769892  | 0.297106  | 1.0078250  |
| 24 | 2.531884  | 0.195217  | 1.071909  | 1.0078250  |
| 25 | 0.890539  | 2.201894  | -1.536852 | 1.0078250  |
| 26 | 1.455250  | 0.830868  | -2.487875 | 1.0078250  |
| 27 | -0.267696 | 1.035608  | -2.160680 | 1.0078250  |

---

---

Table S4. The results of fitting the rm(1) geometry of the camphor molecule.

CAMPHOR, standard bond type declaration starting at the oxygen

!  
! CH bonds from [MP2+(1/4)(MP2-HF)]/6-31G\*\* rounded to nearest 0.001A  
!

NUMBER OF ATOMS = 27

| NO | NA | NB | NC | NO.NA    | NO.NA.NB   | NO.NA.NB.NC | MASS       | Fig.1   |
|----|----|----|----|----------|------------|-------------|------------|---------|
| 1  | 0  | 0  | 0  | 0.000000 | 0.000000   | 0.000000    | 15.9949150 | = O     |
| 2  | 1  | 0  | 0  | 1.225510 | 0.000000   | 0.000000    | 12.0000000 | = C2    |
| 3  | 2  | 1  | 0  | 1.527410 | 126.634000 | 0.000000    | 12.0000000 | = C1    |
| 4  | 2  | 1  | 3  | 1.535990 | 126.648000 | -179.703000 | 12.0000000 | = C3    |
| 5  | 3  | 2  | 1  | 1.513010 | 113.903000 | 16.919000   | 12.0000000 | = C10   |
| 6  | 4  | 2  | 5  | 1.537890 | 101.432000 | -13.656000  | 12.0000000 | = C4    |
| 7  | 3  | 2  | 1  | 1.557260 | 100.279000 | 145.912000  | 12.0000000 | = C7    |
| 8  | 3  | 2  | 4  | 1.555860 | 103.308000 | 70.849000   | 12.0000000 | = C6    |
| 9  | 6  | 4  | 2  | 1.542350 | 106.544000 | -72.288000  | 12.0000000 | = C5    |
| 10 | 7  | 3  | 5  | 1.529750 | 114.152000 | -63.350000  | 12.0000000 | = C9    |
| 11 | 7  | 3  | 5  | 1.532870 | 112.976000 | 60.464000   | 12.0000000 | = C8    |
| 12 | 5  | 3  | 7  | 1.091000 | 109.923000 | -175.885000 | 1.0078250  | = H10   |
| 13 | 5  | 3  | 7  | 1.092000 | 111.058000 | -57.139000  | 1.0078250  | = H10'  |
| 14 | 5  | 3  | 7  | 1.091000 | 111.020000 | 63.929000   | 1.0078250  | = H10'' |
| 15 | 6  | 7  | 3  | 1.094000 | 114.822000 | 179.918000  | 1.0078250  | = H4    |
| 16 | 4  | 2  | 1  | 1.093000 | 109.684000 | -60.094000  | 1.0078250  | = H3    |
| 17 | 4  | 2  | 1  | 1.093000 | 110.784000 | 58.298000   | 1.0078250  | = H3'   |
| 18 | 9  | 8  | 3  | 1.092000 | 111.577000 | -117.360000 | 1.0078250  | = H5    |
| 19 | 9  | 8  | 3  | 1.092000 | 112.432000 | 122.331000  | 1.0078250  | = H5'   |
| 20 | 8  | 9  | 6  | 1.093000 | 112.976000 | -118.360000 | 1.0078250  | = H8    |
| 21 | 8  | 9  | 6  | 1.093000 | 111.963000 | 120.812000  | 1.0078250  | = H8'   |
| 22 | 10 | 7  | 3  | 1.093000 | 109.716000 | -172.169000 | 1.0078250  | = H9    |
| 23 | 10 | 7  | 3  | 1.092000 | 110.291000 | 69.501000   | 1.0078250  | = H9'   |
| 24 | 10 | 7  | 3  | 1.089000 | 113.430000 | -51.530000  | 1.0078250  | = H9''  |
| 25 | 11 | 7  | 3  | 1.092000 | 110.113000 | -73.539000  | 1.0078250  | = H8    |
| 26 | 11 | 7  | 3  | 1.091000 | 110.221000 | 167.908000  | 1.0078250  | = H8'   |
| 27 | 11 | 7  | 3  | 1.091000 | 113.378000 | 46.667000   | 1.0078250  | = H8''  |

FINAL RESULTS OF LEAST SQUARES FIT:

|               |                                    |
|---------------|------------------------------------|
| R( 3, 2) =    | 1.538489 +- 0.007292               |
| R( 8, 3) =    | 1.549294 +- 0.004469               |
| R( 7, 3) =    | 1.523952 +- 0.006902               |
| R( 5, 3) =    | 1.523716 +- 0.002624               |
| R( 4, 2) =    | 1.528235 +- 0.003073               |
| R( 2, 1) =    | 1.212981 +- 0.001225               |
| R( 6, 4) =    | 1.533033 +- 0.004701               |
| R( 9, 6) =    | 1.540865 +- 0.003940               |
| R(11, 7) =    | 1.543883 +- 0.003893               |
| R(10, 7) =    | 1.532195 +- 0.003378               |
| A( 8, 3, 2) = | 102.321534 +- 0.414847             |
| A( 7, 3, 2) = | 100.682451 +- 0.250123             |
| A( 5, 3, 2) = | 113.085003 +- 0.434250             |
| A( 3, 2, 1) = | 127.009165 +- 0.103368 and at N= 4 |
| A( 6, 4, 2) = | 101.543784 +- 0.086088             |
| A( 9, 6, 4) = | 106.640752 +- 0.178981             |
| A(11, 7, 3) = | 113.115651 +- 0.287269             |

A(10, 7, 3) = 114.015746 +- 0.458345  
 D( 4, 2, 1, 3) = [-180.000000 ] FIXED  
 D( 5, 3, 2, 1) = 16.096812 +- 0.244086  
 D( 6, 4, 2, 5) = -13.576096 +- 0.208465  
 D( 7, 3, 2, 1) = 145.750217 +- 0.244857  
 D( 8, 3, 2, 4) = 72.384908 +- 0.322738  
 D( 9, 6, 4, 2) = -72.426221 +- 0.126404  
 D(10, 7, 3, 5) = -63.008871 +- 0.561715  
 D(11, 7, 3, 5) = 60.013043 +- 0.602269  
 c\_a = 0.086286 +- 0.026503  
 c\_b = 0.133107 +- 0.029303  
 c\_c = 0.119436 +- 0.027964

Chi-squared = 0.0001284099  
 Deviation of fit = 0.004006

| Ni | Axis | Iobs      | Icalc     | Io-c     | Bobs      | Bcalc     | Bo-c    |
|----|------|-----------|-----------|----------|-----------|-----------|---------|
| 1  | a    | 349.26740 | 349.26319 | 0.00421  | 1446.9687 | 1446.9862 | -0.0174 |
| 1  | b    | 427.06864 | 427.06604 | 0.00260  | 1183.3672 | 1183.3744 | -0.0072 |
| 1  | c    | 460.64947 | 460.64615 | 0.00332  | 1097.1010 | 1097.1089 | -0.0079 |
| 2  | a    | 349.81540 | 349.81257 | 0.00283  | 1444.7020 | 1444.7137 | -0.0117 |
| 2  | b    | 427.42002 | 427.42117 | -0.00115 | 1182.3943 | 1182.3912 | 0.0032  |
| 2  | c    | 460.93292 | 460.93549 | -0.00257 | 1096.4264 | 1096.4202 | 0.0061  |
| 3  | a    | 349.53692 | 349.53776 | -0.00083 | 1445.8530 | 1445.8496 | 0.0034  |
| 3  | b    | 428.11826 | 428.11839 | -0.00013 | 1180.4659 | 1180.4656 | 0.0004  |
| 3  | c    | 461.61293 | 461.61195 | 0.00098  | 1094.8112 | 1094.8135 | -0.0023 |
| 4  | a    | 349.33291 | 349.33704 | -0.00413 | 1446.6974 | 1446.6803 | 0.0171  |
| 4  | b    | 429.01885 | 429.02040 | -0.00155 | 1177.9879 | 1177.9836 | 0.0043  |
| 4  | c    | 462.55951 | 462.55872 | 0.00079  | 1092.5708 | 1092.5727 | -0.0019 |
| 5  | a    | 351.09245 | 351.09216 | 0.00029  | 1439.4471 | 1439.4483 | -0.0012 |
| 5  | b    | 427.92503 | 427.92410 | 0.00092  | 1180.9990 | 1181.0015 | -0.0025 |
| 5  | c    | 462.62203 | 462.62209 | -0.00006 | 1092.4231 | 1092.4230 | 0.0001  |
| 6  | a    | 352.28505 | 352.28461 | 0.00044  | 1434.5741 | 1434.5759 | -0.0018 |
| 6  | b    | 429.71854 | 429.71881 | -0.00026 | 1176.0698 | 1176.0691 | 0.0007  |
| 6  | c    | 461.02078 | 461.02335 | -0.00257 | 1096.2174 | 1096.2113 | 0.0061  |
| 7  | a    | 351.96995 | 351.96896 | 0.00099  | 1435.8584 | 1435.8624 | -0.0040 |
| 7  | b    | 428.70905 | 428.71006 | -0.00101 | 1178.8391 | 1178.8364 | 0.0028  |
| 7  | c    | 462.92552 | 462.92548 | 0.00003  | 1091.7070 | 1091.7070 | -0.0001 |
| 8  | a    | 352.93834 | 352.93909 | -0.00075 | 1431.9187 | 1431.9157 | 0.0030  |
| 8  | b    | 428.30476 | 428.30525 | -0.00049 | 1179.9519 | 1179.9506 | 0.0013  |
| 8  | c    | 464.28135 | 464.28111 | 0.00025  | 1088.5189 | 1088.5194 | -0.0006 |
| 9  | a    | 353.47250 | 353.47479 | -0.00228 | 1429.7548 | 1429.7456 | 0.0092  |
| 9  | b    | 430.50686 | 430.50528 | 0.00157  | 1173.9163 | 1173.9206 | -0.0043 |
| 9  | c    | 462.60958 | 462.60827 | 0.00131  | 1092.4525 | 1092.4556 | -0.0031 |
| 10 | a    | 353.97913 | 353.97637 | 0.00276  | 1427.7085 | 1427.7196 | -0.0111 |
| 10 | b    | 428.48865 | 428.48866 | -0.00001 | 1179.4455 | 1179.4455 | 0.0000  |
| 10 | c    | 464.56314 | 464.56528 | -0.00213 | 1087.8586 | 1087.8536 | 0.0050  |
| 11 | a    | 349.69389 | 349.69285 | 0.00104  | 1445.2040 | 1445.2083 | -0.0043 |
| 11 | b    | 432.44121 | 432.44163 | -0.00042 | 1168.6652 | 1168.6641 | 0.0011  |
| 11 | c    | 466.40846 | 466.40762 | 0.00083  | 1083.5546 | 1083.5565 | -0.0019 |
| 12 | a    | 349.44013 | 349.44470 | -0.00457 | 1446.2535 | 1446.2346 | 0.0189  |
| 12 | b    | 439.97008 | 439.97015 | -0.00006 | 1148.6668 | 1148.6666 | 0.0002  |
| 12 | c    | 473.53027 | 473.53046 | -0.00019 | 1067.2581 | 1067.2577 | 0.0004  |

Correlation coefficients:

|    | 1        | 2      | 3      | 4      | 5      | 6      | 7     | 8 |
|----|----------|--------|--------|--------|--------|--------|-------|---|
| 1: | R( 3, 2) | 1.000  |        |        |        |        |       |   |
| 2: | R( 8, 3) | -0.350 | 1.000  |        |        |        |       |   |
| 3: | R( 7, 3) | -0.639 | 0.317  | 1.000  |        |        |       |   |
| 4: | R( 5, 3) | 0.039  | -0.582 | -0.252 | 1.000  |        |       |   |
| 5: | R( 4, 2) | 0.021  | 0.185  | 0.146  | -0.048 | 1.000  |       |   |
| 6: | R( 2, 1) | 0.129  | -0.311 | -0.252 | 0.244  | -0.281 | 1.000 |   |

|     |                |        |        |        |        |        |        |        |        |
|-----|----------------|--------|--------|--------|--------|--------|--------|--------|--------|
| 7:  | R( 6, 4)       | -0.167 | 0.190  | 0.395  | -0.140 | -0.497 | -0.081 | 1.000  |        |
| 8:  | R( 9, 6)       | 0.078  | 0.107  | 0.165  | -0.028 | 0.328  | -0.029 | -0.248 | 1.000  |
| 9:  | R(11, 7)       | 0.087  | -0.034 | -0.226 | -0.045 | -0.022 | 0.035  | -0.089 | 0.003  |
| 10: | R(10, 7)       | 0.169  | 0.068  | 0.133  | -0.009 | 0.261  | 0.008  | -0.021 | 0.142  |
| 11: | A( 8, 3, 2)    | -0.855 | 0.048  | 0.676  | 0.156  | -0.098 | -0.186 | 0.215  | -0.021 |
| 12: | A( 7, 3, 2)    | -0.651 | 0.294  | 0.044  | 0.181  | -0.168 | -0.198 | 0.110  | -0.180 |
| 13: | A( 5, 3, 2)    | -0.906 | 0.531  | 0.757  | -0.346 | 0.057  | -0.229 | 0.282  | -0.006 |
| 14: | A( 3, 2, 1)    | 0.656  | -0.454 | -0.723 | 0.449  | 0.315  | -0.044 | -0.590 | 0.030  |
| 15: | A( 6, 4, 2)    | 0.117  | 0.013  | -0.014 | 0.021  | 0.012  | -0.378 | -0.206 | 0.382  |
| 16: | A( 9, 6, 4)    | 0.074  | -0.096 | -0.163 | 0.054  | 0.146  | -0.005 | -0.347 | -0.419 |
| 17: | A(11, 7, 3)    | 0.309  | -0.461 | -0.238 | 0.374  | -0.028 | 0.151  | -0.064 | 0.021  |
| 18: | A(10, 7, 3)    | -0.661 | 0.200  | 0.202  | -0.026 | -0.244 | -0.145 | 0.202  | -0.157 |
| 19: | D( 5, 3, 2, 1) | -0.527 | -0.300 | 0.613  | 0.169  | 0.069  | -0.077 | 0.122  | 0.037  |
| 20: | D( 6, 4, 2, 5) | 0.226  | 0.179  | -0.119 | -0.125 | 0.054  | 0.035  | -0.043 | 0.395  |
| 21: | D( 7, 3, 2, 1) | -0.198 | 0.602  | 0.107  | -0.565 | -0.061 | -0.211 | 0.116  | -0.045 |
| 22: | D( 8, 3, 2, 4) | 0.722  | -0.443 | -0.819 | 0.339  | -0.035 | 0.255  | -0.307 | -0.112 |
| 23: | D( 9, 6, 4, 2) | -0.096 | -0.062 | 0.200  | 0.062  | 0.168  | -0.106 | -0.119 | 0.236  |
| 24: | D(10, 7, 3, 5) | -0.670 | 0.535  | 0.449  | -0.307 | 0.037  | -0.213 | 0.155  | -0.066 |
| 25: | D(11, 7, 3, 5) | -0.837 | 0.448  | 0.435  | -0.121 | -0.031 | -0.219 | 0.217  | -0.082 |
| 26: | c_a            | -0.277 | -0.216 | -0.312 | 0.062  | -0.632 | 0.072  | 0.011  | -0.471 |
| 27: | c_b            | 0.114  | -0.343 | -0.648 | 0.167  | -0.056 | 0.239  | -0.602 | -0.345 |
| 28: | c_c            | 0.149  | -0.459 | -0.616 | 0.183  | -0.096 | 0.256  | -0.597 | -0.158 |

|   |    |    |    |    |    |    |    |
|---|----|----|----|----|----|----|----|
| 9 | 10 | 11 | 12 | 13 | 14 | 15 | 16 |
|---|----|----|----|----|----|----|----|

|     |                |        |        |        |        |        |        |        |        |
|-----|----------------|--------|--------|--------|--------|--------|--------|--------|--------|
| 9:  | R(11, 7)       | 1.000  |        |        |        |        |        |        |        |
| 10: | R(10, 7)       | -0.538 | 1.000  |        |        |        |        |        |        |
| 11: | A( 8, 3, 2)    | -0.122 | -0.205 | 1.000  |        |        |        |        |        |
| 12: | A( 7, 3, 2)    | 0.179  | -0.601 | 0.506  | 1.000  |        |        |        |        |
| 13: | A( 5, 3, 2)    | -0.063 | -0.139 | 0.715  | 0.482  | 1.000  |        |        |        |
| 14: | A( 3, 2, 1)    | 0.077  | 0.166  | -0.598 | -0.253 | -0.777 | 1.000  |        |        |
| 15: | A( 6, 4, 2)    | 0.009  | -0.003 | -0.046 | 0.032  | -0.081 | 0.261  | 1.000  |        |
| 16: | A( 9, 6, 4)    | 0.040  | -0.086 | -0.108 | -0.007 | -0.105 | 0.176  | -0.233 | 1.000  |
| 17: | A(11, 7, 3)    | -0.624 | 0.213  | -0.082 | -0.215 | -0.398 | 0.266  | 0.072  | 0.033  |
| 18: | A(10, 7, 3)    | 0.296  | -0.764 | 0.623  | 0.843  | 0.605  | -0.511 | -0.019 | 0.002  |
| 19: | D( 5, 3, 2, 1) | -0.109 | -0.095 | 0.711  | 0.108  | 0.446  | -0.413 | -0.069 | 0.037  |
| 20: | D( 6, 4, 2, 5) | 0.082  | 0.058  | -0.319 | -0.104 | -0.097 | 0.153  | 0.319  | -0.536 |
| 21: | D( 7, 3, 2, 1) | 0.499  | -0.072 | -0.055 | 0.135  | 0.320  | -0.297 | -0.108 | 0.050  |
| 22: | D( 8, 3, 2, 4) | 0.121  | 0.120  | -0.765 | -0.280 | -0.794 | 0.807  | 0.003  | 0.234  |
| 23: | D( 9, 6, 4, 2) | -0.071 | 0.017  | 0.219  | -0.060 | 0.087  | -0.070 | 0.184  | 0.347  |
| 24: | D(10, 7, 3, 5) | 0.463  | -0.211 | 0.438  | 0.438  | 0.722  | -0.484 | -0.091 | -0.027 |
| 25: | D(11, 7, 3, 5) | 0.065  | -0.520 | 0.661  | 0.837  | 0.833  | -0.588 | -0.016 | -0.054 |
| 26: | c_a            | 0.076  | -0.331 | 0.208  | 0.445  | 0.053  | -0.043 | -0.137 | 0.042  |
| 27: | c_b            | 0.143  | -0.091 | -0.238 | 0.039  | -0.319 | 0.503  | -0.133 | 0.218  |
| 28: | c_c            | 0.087  | -0.062 | -0.213 | -0.059 | -0.331 | 0.514  | -0.095 | 0.166  |

|    |    |    |    |    |    |    |    |
|----|----|----|----|----|----|----|----|
| 17 | 18 | 19 | 20 | 21 | 22 | 23 | 24 |
|----|----|----|----|----|----|----|----|

|     |                |        |        |        |        |        |        |        |        |
|-----|----------------|--------|--------|--------|--------|--------|--------|--------|--------|
| 17: | A(11, 7, 3)    | 1.000  |        |        |        |        |        |        |        |
| 18: | A(10, 7, 3)    | -0.191 | 1.000  |        |        |        |        |        |        |
| 19: | D( 5, 3, 2, 1) | 0.149  | 0.327  | 1.000  |        |        |        |        |        |
| 20: | D( 6, 4, 2, 5) | -0.078 | -0.152 | -0.569 | 1.000  |        |        |        |        |
| 21: | D( 7, 3, 2, 1) | -0.868 | 0.118  | -0.246 | -0.088 | 1.000  |        |        |        |
| 22: | D( 8, 3, 2, 4) | 0.200  | -0.505 | -0.501 | 0.019  | -0.126 | 1.000  |        |        |
| 23: | D( 9, 6, 4, 2) | 0.086  | 0.032  | 0.419  | -0.611 | 0.034  | -0.062 | 1.000  |        |
| 24: | D(10, 7, 3, 5) | -0.855 | 0.461  | 0.075  | 0.031  | 0.734  | -0.500 | -0.043 | 1.000  |
| 25: | D(11, 7, 3, 5) | -0.255 | 0.880  | 0.321  | -0.085 | 0.159  | -0.616 | 0.037  | 0.583  |
| 26: | c_a            | -0.108 | 0.382  | 0.008  | -0.225 | 0.171  | 0.102  | -0.184 | 0.156  |
| 27: | c_b            | -0.039 | -0.097 | -0.221 | -0.110 | 0.032  | 0.474  | -0.182 | -0.066 |
| 28: | c_c            | 0.061  | -0.138 | -0.159 | -0.102 | -0.039 | 0.529  | -0.020 | -0.145 |

|    |    |    |    |
|----|----|----|----|
| 25 | 26 | 27 | 28 |
|----|----|----|----|

|     |                |       |       |
|-----|----------------|-------|-------|
| 25: | D(11, 7, 3, 5) | 1.000 |       |
| 26: | c_a            | 0.208 | 1.000 |

27:           c\_b   -0.210  0.619  1.000  
28:           c\_c   -0.238  0.600  0.907  1.000

---

Final principal coordinates of parent:

| ATOM NO. | A         | B         | C         | MASS       |
|----------|-----------|-----------|-----------|------------|
| 1        | -2.542571 | 0.189882  | -0.209605 | 15.9949150 |
| 2        | -1.377342 | -0.146566 | -0.228757 | 12.0000000 |
| 3        | -0.217778 | 0.485703  | 0.560289  | 12.0000000 |
| 4        | -0.761787 | -1.284937 | -1.041595 | 12.0000000 |
| 5        | -0.556379 | 1.861807  | 1.120107  | 12.0000000 |
| 6        | 0.710039  | -1.201256 | -0.620983 | 12.0000000 |
| 7        | 0.924273  | 0.320914  | -0.435198 | 12.0000000 |
| 8        | 0.076921  | -0.591000 | 1.634614  | 12.0000000 |
| 9        | 0.785963  | -1.725589 | 0.825936  | 12.0000000 |
| 10       | 2.300615  | 0.689672  | 0.128116  | 12.0000000 |
| 11       | 0.722804  | 1.138120  | -1.729477 | 12.0000000 |
| 12       | -1.440939 | 1.797327  | 1.755463  | 1.0078250  |
| 13       | -0.780861 | 2.567510  | 0.317576  | 1.0078250  |
| 14       | 0.269806  | 2.257292  | 1.712804  | 1.0078250  |
| 15       | 1.405112  | -1.681406 | -1.316083 | 1.0078250  |
| 16       | -0.923289 | -1.105359 | -2.107578 | 1.0078250  |
| 17       | -1.236337 | -2.238199 | -0.795134 | 1.0078250  |
| 18       | 1.808802  | -1.886880 | 1.172708  | 1.0078250  |
| 19       | 0.265672  | -2.682290 | 0.906471  | 1.0078250  |
| 20       | -0.822188 | -0.934279 | 2.152700  | 1.0078250  |
| 21       | 0.734612  | -0.156319 | 2.391677  | 1.0078250  |
| 22       | 3.078175  | 0.416096  | -0.589662 | 1.0078250  |
| 23       | 2.366709  | 1.767408  | 0.291149  | 1.0078250  |
| 24       | 2.528992  | 0.195612  | 1.071339  | 1.0078250  |
| 25       | 0.887487  | 2.199571  | -1.532839 | 1.0078250  |
| 26       | 1.443262  | 0.827478  | -2.487582 | 1.0078250  |
| 27       | -0.277576 | 1.038249  | -2.153205 | 1.0078250  |

---

Terms in I.fitted = I.rigid + eps

| Ni | (I_a)rig  | (I_b)rig  | (I_c)rig  | eps_a   | eps_b   | eps_c   |
|----|-----------|-----------|-----------|---------|---------|---------|
| 1  | 347.65435 | 424.32414 | 458.08985 | 1.60884 | 2.74191 | 2.55630 |
| 2  | 348.20245 | 424.67815 | 458.37841 | 1.61012 | 2.74302 | 2.55709 |
| 3  | 347.92825 | 425.37308 | 459.05295 | 1.60950 | 2.74531 | 2.55900 |
| 4  | 347.72801 | 426.27224 | 459.99716 | 1.60903 | 2.74815 | 2.56156 |
| 5  | 349.47891 | 425.17972 | 460.06026 | 1.61325 | 2.74438 | 2.56182 |
| 6  | 350.66881 | 426.96844 | 458.46591 | 1.61580 | 2.75036 | 2.55744 |
| 7  | 350.35358 | 425.96324 | 460.36277 | 1.61538 | 2.74682 | 2.56272 |
| 8  | 351.32138 | 425.55993 | 461.71461 | 1.61771 | 2.74531 | 2.56649 |
| 9  | 351.85590 | 427.75285 | 460.04633 | 1.61889 | 2.75244 | 2.56194 |
| 10 | 352.35644 | 425.74266 | 461.99789 | 1.61993 | 2.74601 | 2.56739 |
| 11 | 348.08253 | 429.68296 | 463.83537 | 1.61032 | 2.75867 | 2.57226 |
| 12 | 347.83510 | 437.18720 | 470.93872 | 1.60960 | 2.78295 | 2.59174 |

---

Table S5. The observed and the obs.-calc. frequencies (MHz) of measured Stark components of rotational transitions in the parent isopomer of camphor.

TRANSITIONS (F and MF in units of 1/2):

|     | J | K  | K  | <- | J | K  | K  | F  | MF<- | F | MF | Volts  | Obs         | Obs-Calc |
|-----|---|----|----|----|---|----|----|----|------|---|----|--------|-------------|----------|
|     |   | -1 | +1 |    |   | -1 | +1 |    |      |   |    |        |             |          |
| 1.  | 4 | 2  | 3  |    | 3 | 1  | 2  | 8  | 0    | 6 | 0  | 0.0    | 9781.80900  | 0.00017  |
| 2.  | 4 | 2  | 3  |    | 3 | 1  | 2  | 8  | 2    | 6 | 2  | 945.7  | 9781.65700  | -0.00206 |
| 3.  | 4 | 2  | 3  |    | 3 | 1  | 2  | 8  | 2    | 6 | 2  | 1336.4 | 9781.50850  | -0.00135 |
| 4.  | 4 | 2  | 3  |    | 3 | 1  | 2  | 8  | 2    | 6 | 2  | 1636.5 | 9781.36230  | 0.00165  |
| 5.  | 4 | 2  | 3  |    | 3 | 1  | 2  | 8  | 2    | 6 | 2  | 1888.4 | 9781.21250  | 0.00023  |
| 6.  | 4 | 2  | 3  |    | 3 | 1  | 2  | 8  | 2    | 6 | 2  | 2113.5 | 9781.06010  | -0.00173 |
| 7.  | 5 | 3  | 3  |    | 4 | 2  | 2  | 10 | 2    | 8 | 2  | 0.0    | 12799.97630 | -0.00002 |
| 8.  | 5 | 3  | 3  |    | 4 | 2  | 2  | 10 | 2    | 8 | 2  | 568.5  | 12799.78300 | -0.00091 |
| 9.  | 5 | 3  | 3  |    | 4 | 2  | 2  | 10 | 2    | 8 | 2  | 798.8  | 12799.60060 | 0.00344  |
| 10. | 5 | 3  | 3  |    | 4 | 2  | 2  | 10 | 2    | 8 | 2  | 982.2  | 12799.40570 | 0.00150  |
| 11. | 5 | 2  | 4  |    | 4 | 1  | 3  | 10 | 0    | 8 | 0  | 0.0    | 11893.77040 | -0.00053 |
| 12. | 5 | 2  | 4  |    | 4 | 1  | 3  | 10 | 2    | 8 | 2  | 2529.7 | 11893.54610 | -0.00424 |
| 13. | 5 | 2  | 4  |    | 4 | 1  | 3  | 10 | 2    | 8 | 2  | 3581.8 | 11893.32750 | -0.00134 |
| 14. | 5 | 2  | 4  |    | 4 | 1  | 3  | 10 | 2    | 8 | 2  | 4370.9 | 11893.11020 | -0.00260 |
| 15. | 5 | 2  | 4  |    | 4 | 1  | 3  | 10 | 2    | 8 | 2  | 5057.8 | 11892.88760 | -0.00239 |
| 16. | 5 | 2  | 4  |    | 4 | 1  | 3  | 10 | 2    | 8 | 2  | 5668.5 | 11892.66160 | -0.00318 |
| 17. | 5 | 2  | 4  |    | 4 | 1  | 3  | 10 | 2    | 8 | 2  | 6196.2 | 11892.44880 | -0.00087 |
| 18. | 5 | 2  | 4  |    | 4 | 1  | 3  | 10 | 4    | 8 | 4  | 1131.0 | 11893.61740 | -0.00299 |
| 19. | 5 | 2  | 4  |    | 4 | 1  | 3  | 10 | 4    | 8 | 4  | 1603.9 | 11893.46570 | -0.00257 |
| 20. | 5 | 2  | 4  |    | 4 | 1  | 3  | 10 | 4    | 8 | 4  | 1965.8 | 11893.31510 | -0.00131 |
| 21. | 5 | 2  | 4  |    | 4 | 1  | 3  | 10 | 4    | 8 | 4  | 2267.4 | 11893.16170 | -0.00473 |
| 22. | 5 | 2  | 4  |    | 4 | 1  | 3  | 10 | 4    | 8 | 4  | 2535.6 | 11893.01350 | -0.00170 |
| 23. | 5 | 2  | 4  |    | 4 | 1  | 3  | 10 | 4    | 8 | 4  | 2778.8 | 11892.86150 | -0.00205 |
| 24. | 5 | 2  | 4  |    | 4 | 1  | 3  | 10 | 4    | 8 | 4  | 2998.9 | 11892.71130 | -0.00314 |
| 25. | 4 | 0  | 4  |    | 3 | 0  | 3  | 8  | 0    | 6 | 0  | 0.0    | 8975.68320  | -0.00010 |
| 26. | 4 | 0  | 4  |    | 3 | 0  | 3  | 8  | 4    | 6 | 4  | 2530.5 | 8975.89860  | 0.00161  |
| 27. | 4 | 0  | 4  |    | 3 | 0  | 3  | 8  | 4    | 6 | 4  | 3582.4 | 8976.11580  | 0.00221  |
| 28. | 4 | 0  | 4  |    | 3 | 0  | 3  | 8  | 4    | 6 | 4  | 4371.6 | 8976.32710  | 0.00007  |
| 29. | 4 | 0  | 4  |    | 3 | 0  | 3  | 8  | 4    | 6 | 4  | 5060.7 | 8976.55080  | 0.00068  |
| 30. | 4 | 0  | 4  |    | 3 | 0  | 3  | 8  | 4    | 6 | 4  | 6203.3 | 8976.99990  | 0.00168  |
| 31. | 4 | 0  | 4  |    | 3 | 0  | 3  | 8  | 4    | 6 | 4  | 7161.4 | 8977.45420  | 0.00162  |
| 32. | 4 | 0  | 4  |    | 3 | 0  | 3  | 8  | 4    | 6 | 4  | 8000.4 | 8977.91100  | -0.00159 |
| 33. | 4 | 0  | 4  |    | 3 | 0  | 3  | 8  | 6    | 6 | 6  | 2530.5 | 8976.26330  | 0.00010  |
| 34. | 4 | 0  | 4  |    | 3 | 0  | 3  | 8  | 6    | 6 | 6  | 3582.4 | 8976.85790  | 0.00290  |
| 35. | 4 | 0  | 4  |    | 3 | 0  | 3  | 8  | 6    | 6 | 6  | 4371.6 | 8977.44040  | -0.00172 |
| 36. | 4 | 0  | 4  |    | 3 | 0  | 3  | 8  | 6    | 6 | 6  | 5060.7 | 8978.06580  | 0.00574  |
| 37. | 4 | 1  | 3  |    | 3 | 1  | 2  | 8  | 0    | 6 | 0  | 0.0    | 9250.65450  | -0.00174 |
| 38. | 4 | 1  | 3  |    | 3 | 1  | 2  | 8  | 2    | 6 | 2  | 2530.5 | 9250.40160  | -0.00070 |
| 39. | 4 | 1  | 3  |    | 3 | 1  | 2  | 8  | 2    | 6 | 2  | 3577.0 | 9250.15100  | 0.00185  |
| 40. | 4 | 1  | 3  |    | 3 | 1  | 2  | 8  | 4    | 6 | 4  | 2530.5 | 9249.77780  | 0.00104  |
| 41. | 4 | 1  | 3  |    | 3 | 1  | 2  | 8  | 4    | 6 | 4  | 3577.0 | 9248.90720  | 0.00223  |

|     |   |   |   |   |   |   |    |    |    |    |         |             |          |
|-----|---|---|---|---|---|---|----|----|----|----|---------|-------------|----------|
| 42. | 4 | 1 | 3 | 3 | 1 | 2 | 8  | 4  | 6  | 4  | 4383.1  | 9248.04230  | 0.00653  |
| 43. | 5 | 2 | 4 | 4 | 2 | 3 | 10 | 0  | 8  | 0  | 0.0     | 11362.61760 | -0.00073 |
| 44. | 5 | 2 | 4 | 4 | 2 | 3 | 10 | 2  | 8  | 2  | 2530.1  | 11363.21460 | 0.00107  |
| 45. | 5 | 2 | 4 | 4 | 2 | 3 | 10 | 2  | 8  | 2  | 3577.0  | 11363.79900 | -0.00419 |
| 46. | 5 | 2 | 4 | 4 | 2 | 3 | 10 | 2  | 8  | 2  | 4383.1  | 11364.38730 | -0.00295 |
| 47. | 5 | 2 | 4 | 4 | 2 | 3 | 10 | 2  | 8  | 2  | 5061.5  | 11364.96630 | -0.00551 |
| 48. | 5 | 2 | 4 | 4 | 2 | 3 | 10 | 2  | 8  | 2  | 5660.9  | 11365.55380 | 0.00321  |
| 49. | 5 | 1 | 4 | 4 | 1 | 3 | 10 | 0  | 8  | 0  | 0.0     | 11514.45900 | -0.00101 |
| 50. | 5 | 1 | 4 | 4 | 1 | 3 | 10 | 4  | 8  | 4  | 2527.3  | 11514.29930 | -0.00267 |
| 51. | 5 | 1 | 4 | 4 | 1 | 3 | 10 | 4  | 8  | 4  | 3583.8  | 11514.14040 | -0.00226 |
| 52. | 5 | 1 | 4 | 4 | 1 | 3 | 10 | 4  | 8  | 4  | 4381.0  | 11513.98550 | -0.00090 |
| 53. | 5 | 1 | 4 | 4 | 1 | 3 | 10 | 4  | 8  | 4  | 5064.9  | 11513.82640 | -0.00145 |
| 54. | 5 | 1 | 4 | 4 | 1 | 3 | 10 | 4  | 8  | 4  | 5664.7  | 11513.66990 | -0.00044 |
| 55. | 5 | 1 | 4 | 4 | 1 | 3 | 10 | 4  | 8  | 4  | 6200.5  | 11513.51440 | -0.00077 |
| 56. | 5 | 1 | 4 | 4 | 1 | 3 | 10 | 4  | 8  | 4  | 6702.0  | 11513.35680 | -0.00088 |
| 57. | 5 | 1 | 4 | 4 | 1 | 3 | 10 | 6  | 8  | 6  | 2527.3  | 11514.13690 | -0.00176 |
| 58. | 5 | 1 | 4 | 4 | 1 | 3 | 10 | 6  | 8  | 6  | 3583.8  | 11513.81600 | -0.00002 |
| 59. | 5 | 1 | 4 | 4 | 1 | 3 | 10 | 6  | 8  | 6  | 4381.0  | 11513.49860 | -0.00228 |
| 60. | 5 | 1 | 4 | 4 | 1 | 3 | 10 | 6  | 8  | 6  | 5064.9  | 11513.18110 | -0.00137 |
| 61. | 5 | 1 | 4 | 4 | 1 | 3 | 10 | 6  | 8  | 6  | 5664.7  | 11512.86790 | 0.00040  |
| 62. | 5 | 1 | 4 | 4 | 1 | 3 | 10 | 6  | 8  | 6  | 6200.5  | 11512.55660 | -0.00197 |
| 63. | 5 | 1 | 4 | 4 | 1 | 3 | 10 | 6  | 8  | 6  | 6702.0  | 11512.24480 | -0.00162 |
| 64. | 5 | 2 | 3 | 4 | 2 | 2 | 10 | 0  | 8  | 0  | 0.0     | 11599.93810 | -0.00137 |
| 65. | 5 | 2 | 3 | 4 | 2 | 2 | 10 | 2  | 8  | 2  | 2527.3  | 11599.33430 | 0.00124  |
| 66. | 5 | 2 | 3 | 4 | 2 | 2 | 10 | 2  | 8  | 2  | 3583.8  | 11598.72610 | 0.00118  |
| 67. | 5 | 2 | 3 | 4 | 2 | 2 | 10 | 2  | 8  | 2  | 4381.0  | 11598.13260 | 0.00110  |
| 68. | 5 | 2 | 3 | 4 | 2 | 2 | 10 | 2  | 8  | 2  | 5064.9  | 11597.53420 | 0.00180  |
| 69. | 5 | 2 | 3 | 4 | 2 | 2 | 10 | 2  | 8  | 2  | 5664.7  | 11596.94620 | 0.00606  |
| 70. | 6 | 1 | 5 | 5 | 1 | 4 | 12 | 0  | 10 | 0  | 0.0     | 13741.90280 | -0.00013 |
| 71. | 6 | 1 | 5 | 5 | 1 | 4 | 12 | 4  | 10 | 4  | 3577.9  | 13741.83400 | -0.00366 |
| 72. | 6 | 1 | 5 | 5 | 1 | 4 | 12 | 4  | 10 | 4  | 5059.8  | 13741.76980 | -0.00295 |
| 73. | 6 | 1 | 5 | 5 | 1 | 4 | 12 | 4  | 10 | 4  | 6199.9  | 13741.70480 | -0.00320 |
| 74. | 6 | 1 | 5 | 5 | 1 | 4 | 12 | 4  | 10 | 4  | 9643.3  | 13741.43780 | 0.00100  |
| 75. | 6 | 1 | 5 | 5 | 1 | 4 | 12 | 4  | 10 | 4  | 10403.5 | 13741.36060 | -0.00161 |
| 76. | 6 | 1 | 5 | 5 | 1 | 4 | 12 | 6  | 10 | 6  | 3577.9  | 13741.79390 | -0.00416 |
| 77. | 6 | 1 | 5 | 5 | 1 | 4 | 12 | 6  | 10 | 6  | 5059.8  | 13741.69230 | -0.00262 |
| 78. | 6 | 1 | 5 | 5 | 1 | 4 | 12 | 6  | 10 | 6  | 6199.9  | 13741.59060 | -0.00262 |
| 79. | 6 | 1 | 5 | 5 | 1 | 4 | 12 | 6  | 10 | 6  | 8454.3  | 13741.33960 | -0.00005 |
| 80. | 6 | 1 | 5 | 5 | 1 | 4 | 12 | 6  | 10 | 6  | 9640.2  | 13741.17840 | -0.00294 |
| 81. | 6 | 1 | 5 | 5 | 1 | 4 | 12 | 6  | 10 | 6  | 10403.5 | 13741.07180 | 0.00020  |
| 82. | 6 | 1 | 5 | 5 | 1 | 4 | 12 | 8  | 10 | 8  | 5059.8  | 13741.58820 | -0.00128 |
| 83. | 6 | 1 | 5 | 5 | 1 | 4 | 12 | 8  | 10 | 8  | 6199.9  | 13741.43800 | -0.00254 |
| 84. | 6 | 1 | 5 | 5 | 1 | 4 | 12 | 8  | 10 | 8  | 8455.7  | 13741.07920 | -0.00389 |
| 85. | 6 | 1 | 5 | 5 | 1 | 4 | 12 | 8  | 10 | 8  | 9643.7  | 13740.87300 | 0.00161  |
| 86. | 6 | 1 | 5 | 5 | 1 | 4 | 12 | 8  | 10 | 8  | 10403.6 | 13740.73340 | 0.00179  |
| 87. | 6 | 1 | 5 | 5 | 1 | 4 | 12 | 10 | 10 | 10 | 8454.3  | 13740.80200 | -0.00229 |
| 88. | 6 | 1 | 5 | 5 | 1 | 4 | 12 | 10 | 10 | 10 | 9643.3  | 13740.56210 | 0.00060  |
| 89. | 6 | 1 | 5 | 5 | 1 | 4 | 12 | 10 | 10 | 10 | 10403.6 | 13740.41700 | 0.00109  |
| 90. | 6 | 2 | 4 | 5 | 2 | 3 | 12 | 0  | 10 | 0  | 0.0     | 13929.05040 | 0.00315  |
| 91. | 6 | 2 | 4 | 5 | 2 | 3 | 12 | 2  | 10 | 2  | 2530.2  | 13928.92160 | -0.00265 |
| 92. | 6 | 2 | 4 | 5 | 2 | 3 | 12 | 2  | 10 | 2  | 3577.9  | 13928.80020 | -0.00119 |



|     |   |   |   |   |   |   |    |   |    |   |        |             |          |
|-----|---|---|---|---|---|---|----|---|----|---|--------|-------------|----------|
| 93. | 6 | 2 | 4 | 5 | 2 | 3 | 12 | 2 | 10 | 2 | 4379.7 | 13928.67860 | -0.00040 |
| 94. | 6 | 2 | 4 | 5 | 2 | 3 | 12 | 2 | 10 | 2 | 5059.8 | 13928.55620 | 0.00026  |
| 95. | 6 | 2 | 4 | 5 | 2 | 3 | 12 | 2 | 10 | 2 | 5661.4 | 13928.43240 | -0.00001 |
| 96. | 6 | 2 | 4 | 5 | 2 | 3 | 12 | 2 | 10 | 2 | 6199.9 | 13928.31150 | 0.00133  |
| 97. | 6 | 2 | 4 | 5 | 2 | 3 | 12 | 4 | 10 | 4 | 5661.4 | 13926.72850 | 0.00272  |

!-----

! Transitions affected by closest mu\_c-type near-degeneracies

|      |   |   |   |   |   |   |    |   |   |   |        |             |          |
|------|---|---|---|---|---|---|----|---|---|---|--------|-------------|----------|
| 98.  | 5 | 0 | 5 | 4 | 0 | 4 | 10 | 0 | 8 | 0 | 0.0    | 11162.93550 | 0.00015  |
| 99.  | 5 | 0 | 5 | 4 | 0 | 4 | 10 | 4 | 8 | 4 | 2529.5 | 11162.99420 | 0.00243  |
| 100. | 5 | 0 | 5 | 4 | 0 | 4 | 10 | 4 | 8 | 4 | 3577.0 | 11163.05380 | 0.00532  |
| 101. | 5 | 0 | 5 | 4 | 0 | 4 | 10 | 4 | 8 | 4 | 4383.1 | 11163.11160 | 0.00590  |
| 102. | 5 | 0 | 5 | 4 | 0 | 4 | 10 | 4 | 8 | 4 | 5061.5 | 11163.15980 | -0.00335 |
| 103. | 5 | 0 | 5 | 4 | 0 | 4 | 10 | 4 | 8 | 4 | 5662.6 | 11163.21830 | -0.00297 |
| 104. | 5 | 0 | 5 | 4 | 0 | 4 | 10 | 6 | 8 | 6 | 2529.5 | 11163.11340 | 0.00520  |
| 105. | 5 | 1 | 5 | 4 | 1 | 4 | 10 | 0 | 8 | 0 | 0.0    | 11128.70380 | -0.00005 |
| 106. | 5 | 1 | 5 | 4 | 1 | 4 | 10 | 4 | 8 | 4 | 2531.2 | 11128.91200 | 0.00321  |
| 107. | 5 | 1 | 5 | 4 | 1 | 4 | 10 | 4 | 8 | 4 | 3580.5 | 11129.11770 | 0.00417  |
| 108. | 5 | 1 | 5 | 4 | 1 | 4 | 10 | 4 | 8 | 4 | 4378.7 | 11129.31980 | 0.00383  |
| 109. | 5 | 1 | 5 | 4 | 1 | 4 | 10 | 4 | 8 | 4 | 5061.5 | 11129.52450 | 0.00352  |
| 110. | 5 | 1 | 5 | 4 | 1 | 4 | 10 | 4 | 8 | 4 | 5662.6 | 11129.72470 | -0.00091 |

Standard deviation = 0.002562

ITERATION NO = 5 CONSTANTS, deviations and changes:

|      |   |                             |             |
|------|---|-----------------------------|-------------|
| Mu.a | = | 2.993369735 +- 0.000358852  | 0.000000000 |
| Mu.b | = | -0.729836250 +- 0.000242931 | 0.000000000 |
| Mu.c | = | -0.080441770 +- 0.000674137 | 0.000000000 |

FINAL RESULTS OF LEAST SQUARES FITTING PROCEDURE

=====

FITTED CONSTANTS:

|        |      |             |        |      |              |
|--------|------|-------------|--------|------|--------------|
| A      | /MHz | 1446.968977 | 1:Xab  | /MHz | 0.           |
| B      | /MHz | 1183.367110 | 1:XJ.a | /kHz | 0.           |
| C      | /MHz | 1097.101031 | 1:XK.a | /kHz | 0.           |
| DJ     | /kHz | 0.03348038  | 1:XJbc | /kHz | 0.           |
| DJK    | /kHz | 0.08368131  | 1:Ma   | /MHz | 0.           |
| DK     | /kHz | -0.06557013 | 1:Mb-c | /MHz | 0.           |
| dJ     | /kHz | 0.0028638   | 1:Tr   | /MHz | 0.           |
| dK     | /kHz | 0.02485841  | 1:Xd   | /kHz | 0.           |
| HJ     | / Hz | 0.          |        |      |              |
| HJK    | / Hz | 0.          |        |      |              |
| HKJ    | / Hz | 0.          |        |      |              |
| HK     | / Hz | 0.          |        |      |              |
| hJ     | / Hz | 0.          |        |      |              |
| hJK    | / Hz | 0.          | Mu.a   | /D   | 2.99336(35)  |
| hK     | / Hz | 0.          | Mu.b   | /D   | -0.72983(24) |
| LKKJ   | /mHz | 0.          | Mu.c   | /D   | -0.08044(67) |
| 1:Xa   | /MHz | 0.          | d      | /cm  | 26.93        |
| 1:Xb-c | /MHz | 0.          | k      | /cm  | 0.           |

CORRELATION COEFFICIENTS:

|      | Mu.a    | Mu.b    | Mu.c   |
|------|---------|---------|--------|
| Mu.a | 1.0000  |         |        |
| Mu.b | -0.3513 | 1.0000  |        |
| Mu.c | 0.0259  | -0.6773 | 1.0000 |

-----  
-----
